# Supplementary material for: Multivalent amino sugars to recognize different TAR RNA conformations
Source: Royal Society of Chemistry journal article supplement (doi:10.1039/c4md00165f), 2014-01-01
Supplement: c4md00165f1.pdf [file c4md00165f1.pdf]

## Multivalent Amino Sugars to Recognize Different TAR RNA Conformations

Patrick C. Kellish<sup>a</sup>, Sunil Kumar<sup>a</sup>, Todd S. Mack<sup>c</sup>, Meredith Newby Spano<sup>b</sup>, Mirko Hennig<sup>c</sup> and Dev P. Arya<sup>a,b\*</sup>

<sup>a</sup>Laboratory of Medicinal Chemistry, Department of Chemistry, Clemson University, Clemson, South Carolina 29634, United States

<sup>b</sup>NUBAD, LLC, 900B West Faris Rd., Greenville, SC 29605

<sup>c</sup>Department of Biochemistry and Molecular Biology, Medical University of South Carolina, 70 President St., Charleston, SC 29425

\* To whom correspondence should be addressed: Dev P Arya, 461 H.L. Hunter Chemistry Labs, Department of Chemistry, Clemson University, Clemson University, Clemson, South Carolina 29634; Phone: +1-864-656-1106; Fax: +1-864-656-6613; E-mail: [dparya@clemson.edu](mailto:dparya@clemson.edu).

### Supporting Information

#### Appendices

|                                                                       |         |
|-----------------------------------------------------------------------|---------|
| S1. Chemical Structures of Neomycin Dimers. ....                      | Page 2  |
| S2. CD Spectroscopy. ....                                             | Page 3  |
| S3. UV thermal Denaturation Profiles. ....                            | Page 4  |
| S4. Mutant TAR RNA Ethidium Bromide Displacement Assays. ....         | Page 10 |
| Bulgeless TAR RNA Ethidium Bromide Displacement Assays ....           | Page 11 |
| Tetraloop TAR RNA Ethidium Bromide Displacement Assays ....           | Page 21 |
| Bulgeless Tetraloop TAR RNA Ethidium Bromide Displacement Assays .... | Page 31 |
| U3 Bulge TAR RNA Ethidium Bromide Displacement Assays ....            | Page 41 |
| NMR titrations of DPA51 into TAR RNA: stems and bulge ....            | Page 50 |
| NMR titrations of DPA51 into TAR RNA: tetraloop ....                  | Page 51 |

## S1. Chemical Structures of Neomycin Dimers.

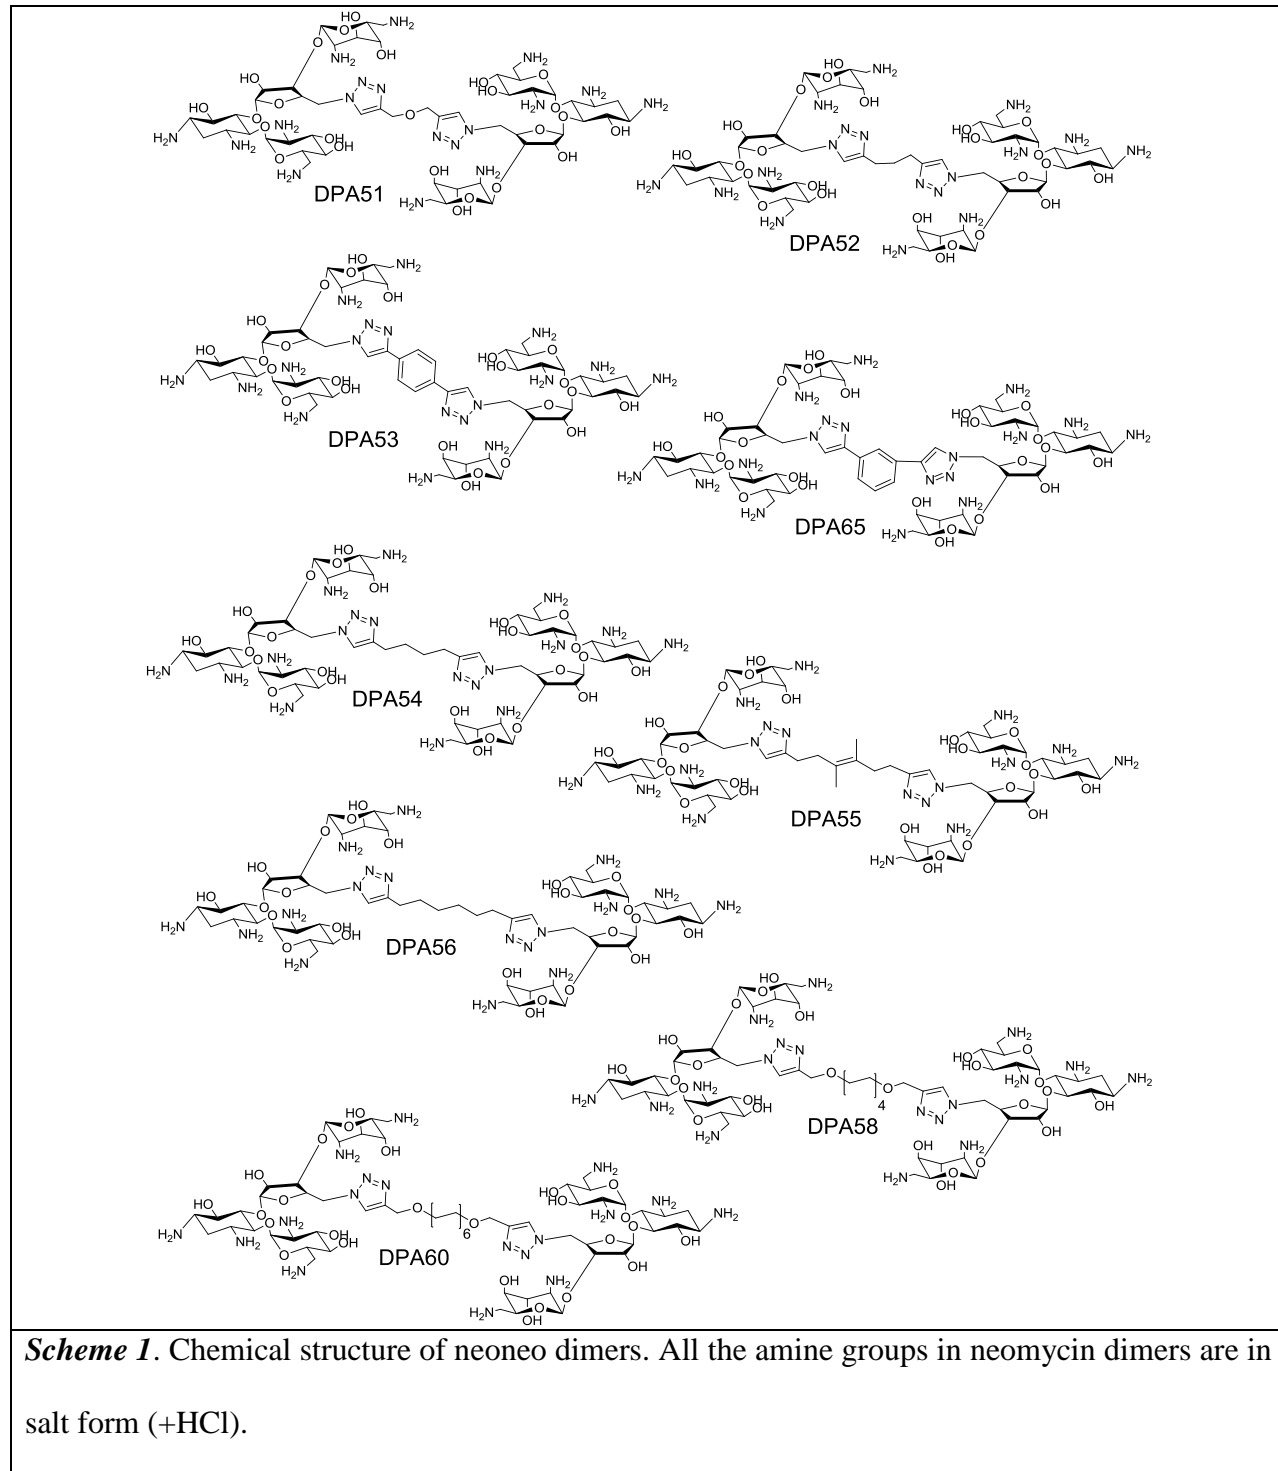

## S2. CD Spectroscopy.

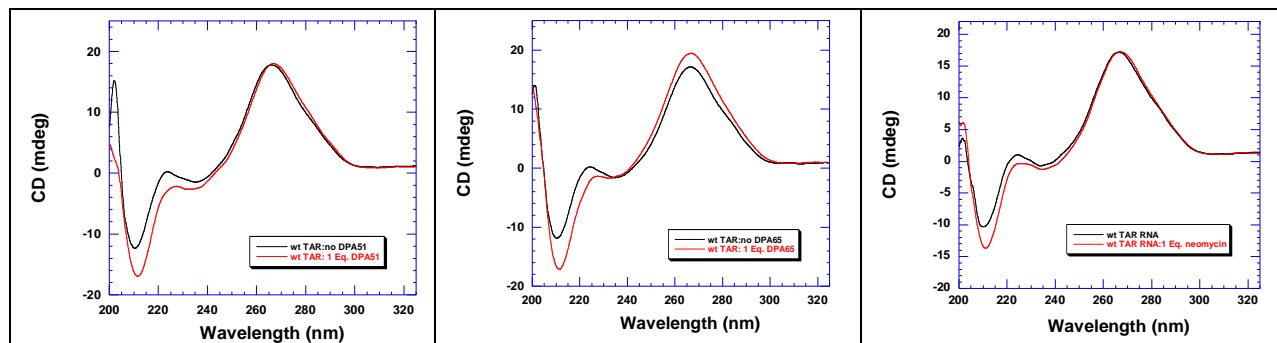

**Figure S2.1.** CD spectra comparison of wildtype TAR RNA with 1 molar equivalent DPA51 (A), DPA65 (B), and neomycin (C) revealing conformational deviations induced by neomycin dimer or neomycin binding. Buffer conditions: 100 mM KCl, 10 mM SC, 0.5 mM EDTA, pH 6.8. [TAR RNA] = 2  $\mu$ M/strand.

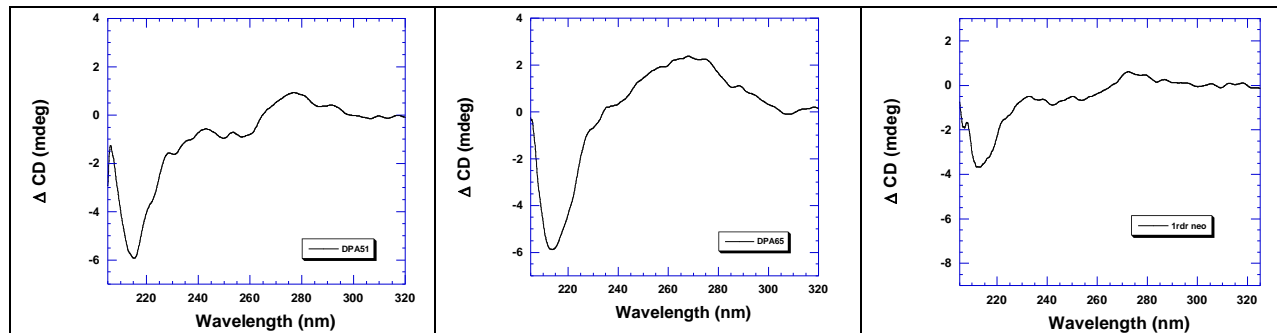

**Figure S2.2.** Change in wildtype TAR RNA molar ellipticity induced by one molar equivalent DPA51 (A), one molar equivalent DPA65 (B), and neomycin (C). Buffer conditions: 100 mM KCl, 10 mM SC, 0.5 mM EDTA, pH 6.8. [TAR RNA] = 2  $\mu$ M/strand.

### S3. UV thermal Denaturation profiles

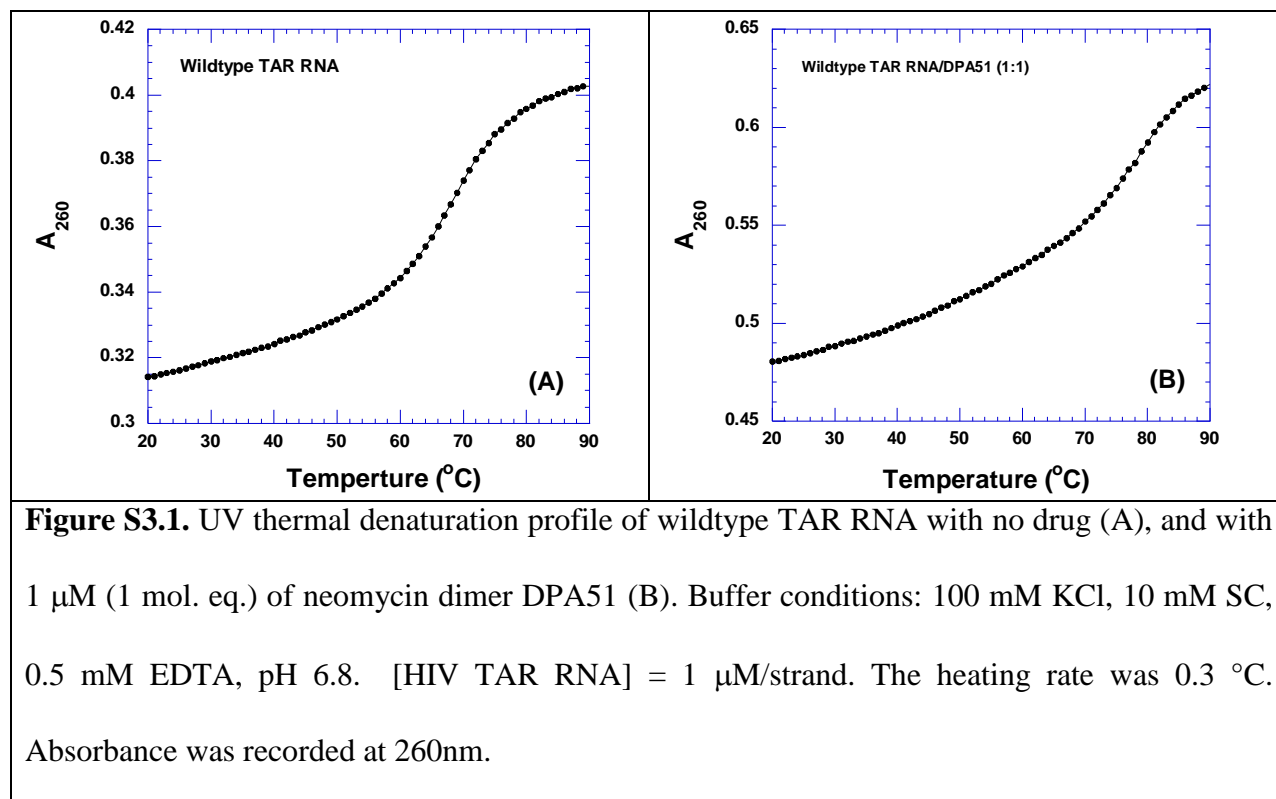

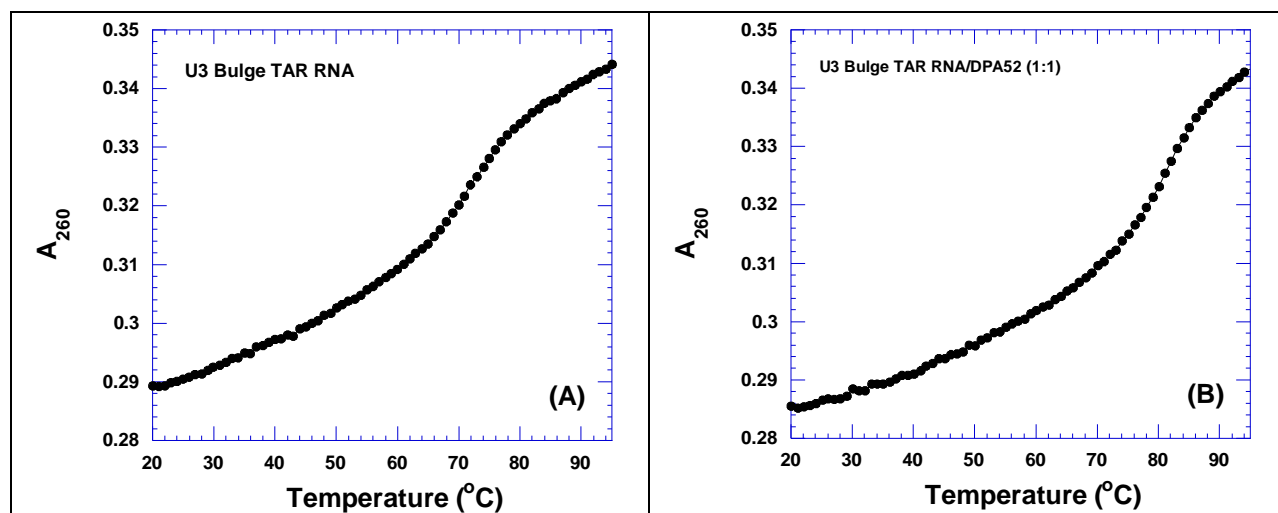

**Figure S3.2.** UV thermal denaturation profile of the U3 budge TAR RNA mutant with no drug (A), and with 1  $\mu\text{M}$  (1 mol. eq.) of neomycin dimer DPA51 (B). Buffer conditions: 100 mM KCl, 10 mM SC, 0.5 mM EDTA, pH 6.8. [HIV TAR RNA] = 1  $\mu\text{M}$ /strand. The heating rate was 0.3  $^{\circ}\text{C}$ . Absorbance was recorded at 260nm.

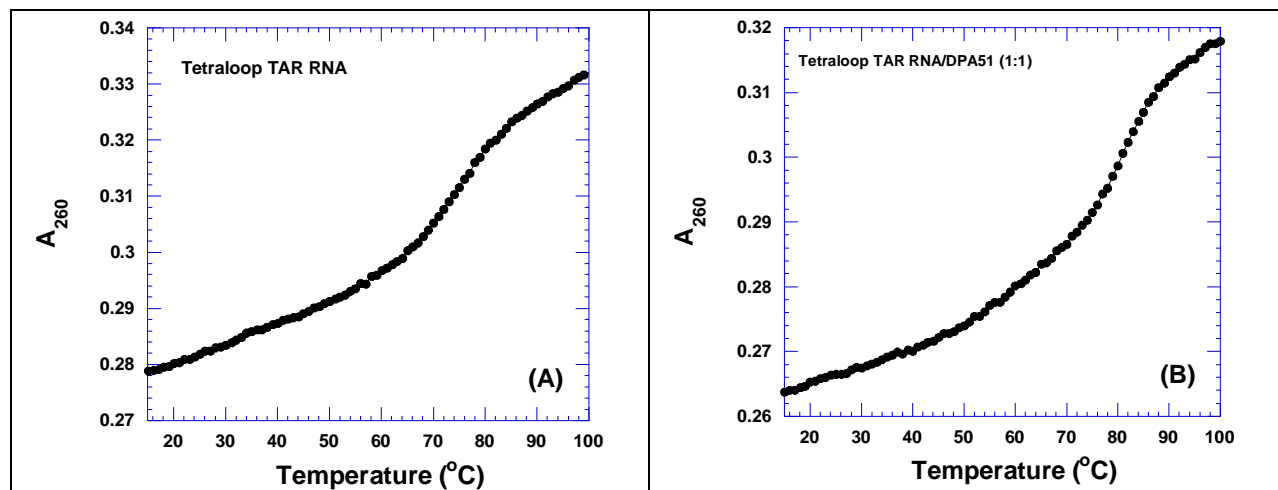

**Figure S3.3.** UV thermal denaturation profile of the tetraloop TAR RNA mutant with no drug (A), and with 1  $\mu\text{M}$  (1 mol. eq.) of neomycin dimer DPA51 (B). Buffer conditions: 100 mM KCl, 10 mM SC, 0.5 mM EDTA, pH 6.8. [HIV TAR RNA] = 1  $\mu\text{M}$ /strand. The heating rate was 0.3  $^{\circ}\text{C}$ . Absorbance was recorded at 260nm.

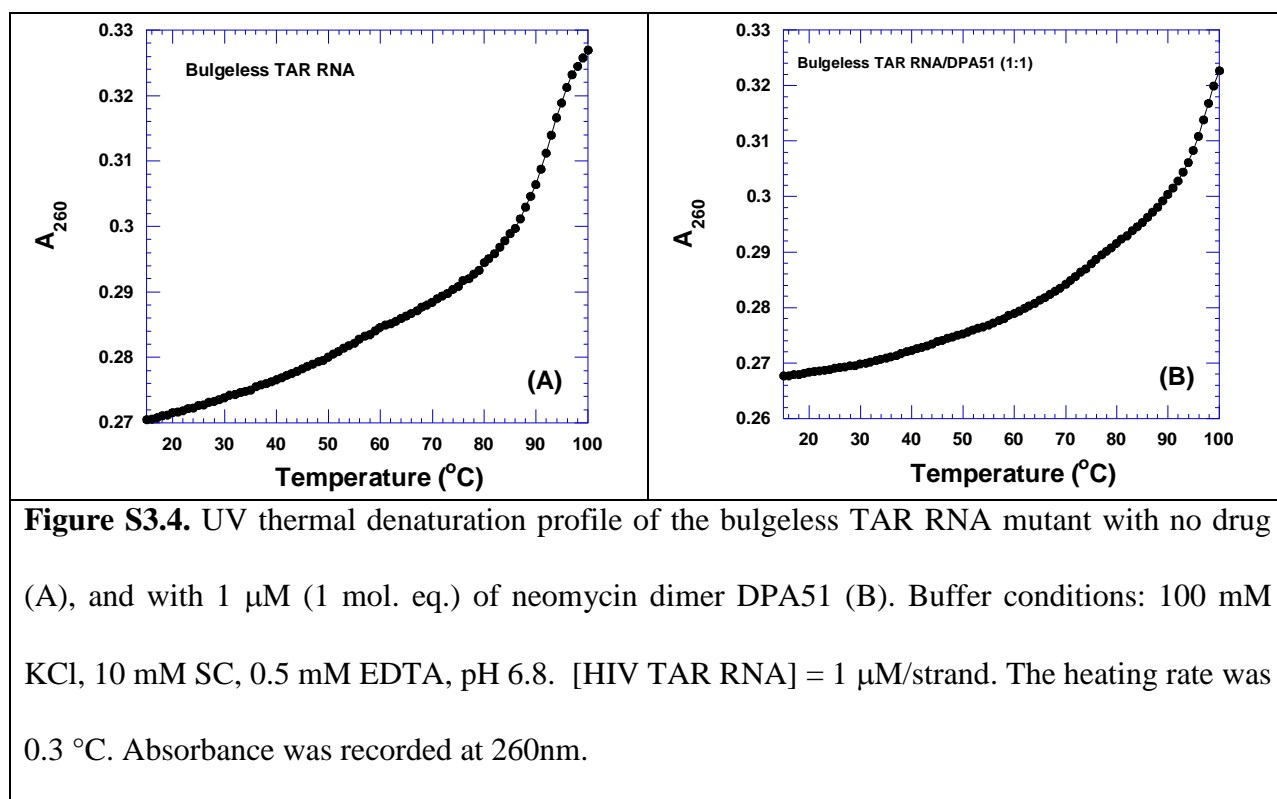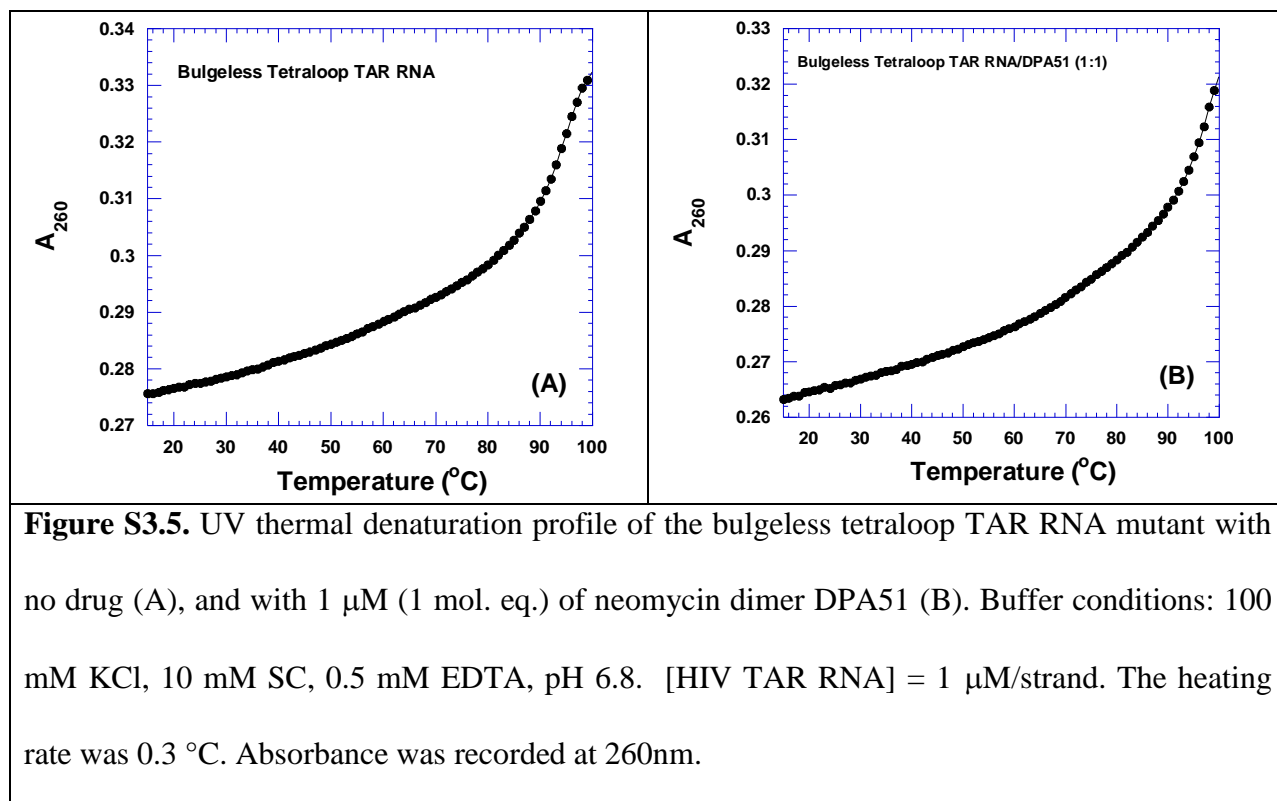

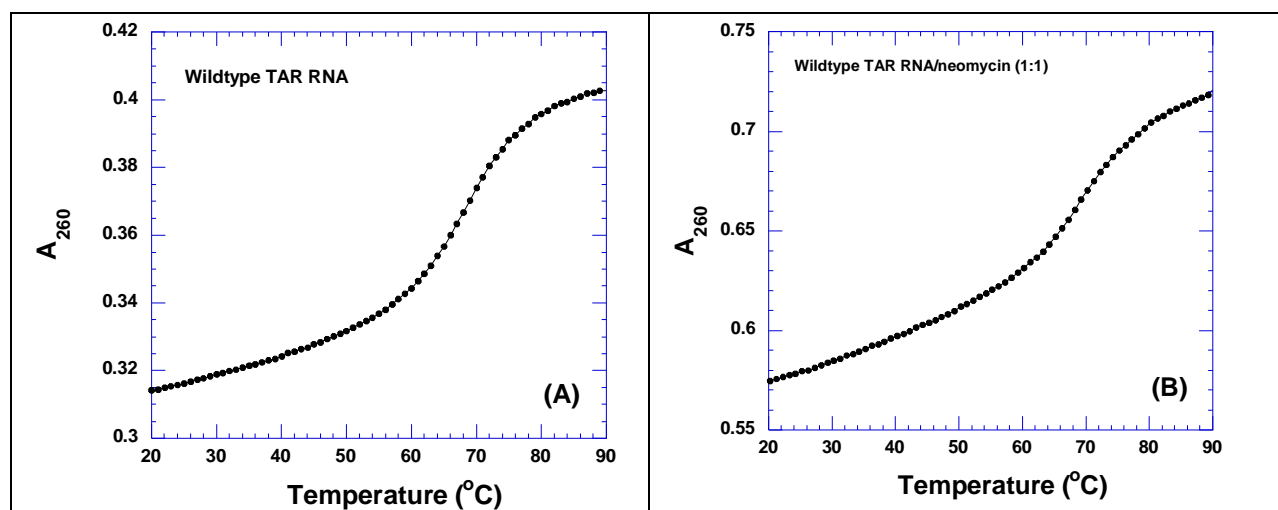

**Figure S3.6.** UV thermal denaturation profile of wildtype TAR RNA with no drug (A), and with 1  $\mu\text{M}$  (1 mol. eq.) neomycin (B). Buffer conditions: 100 mM KCl, 10 mM SC, 0.5 mM EDTA, pH 6.8. [HIV TAR RNA] = 1  $\mu\text{M}$ /strand. The heating rate was 0.3  $^{\circ}\text{C}$ . Absorbance was recorded at 260nm.

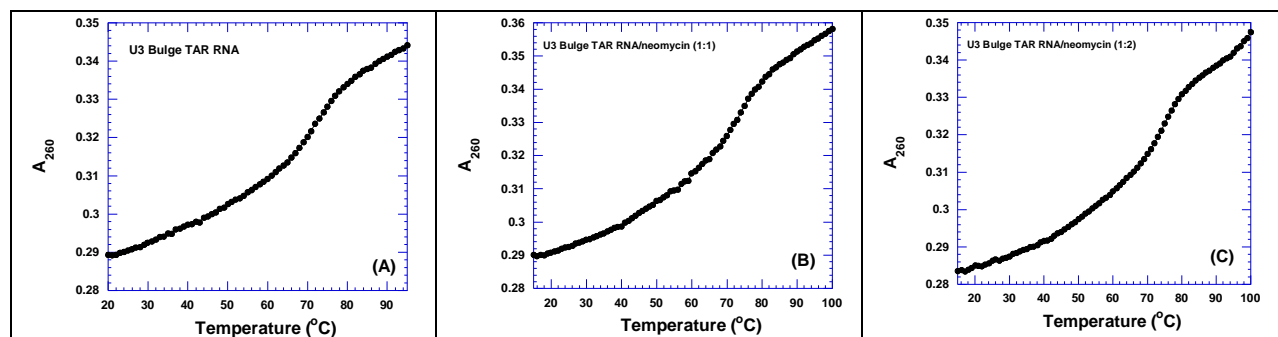

**Figure S3.7.** UV thermal denaturation profile of the U3 bulge TAR RNA mutant with no drug (A), with 1  $\mu\text{M}$  (1 mol. eq.) neomycin (B), and 2 $\mu\text{M}$  (2 mol. Eq.) neomycin (C). Buffer conditions: 100 mM KCl, 10 mM SC, 0.5 mM EDTA, pH 6.8. [HIV TAR RNA] = 1  $\mu\text{M}$ /strand. The heating rate was 0.3  $^{\circ}\text{C}$ . Absorbance was recorded at 260nm.

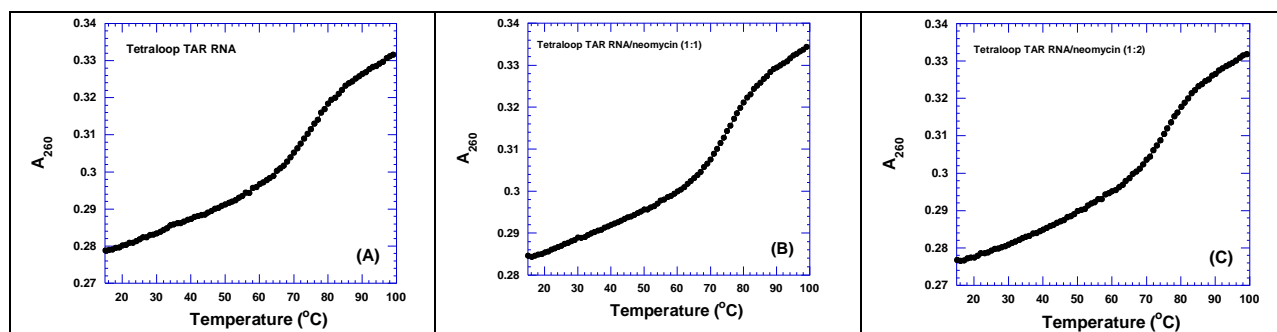

**Figure S3.8.** UV thermal denaturation profile of the tetraloop TAR RNA mutant with no drug (A), with 1  $\mu\text{M}$  (1 mol. eq.) neomycin (B), and 2  $\mu\text{M}$  (2 mol. Eq.) neomycin (C). Buffer conditions: 100 mM KCl, 10 mM SC, 0.5 mM EDTA, pH 6.8. [HIV TAR RNA] = 1  $\mu\text{M}$ /strand. The heating rate was 0.3  $^{\circ}\text{C}$ . Absorbance was recorded at 260nm.

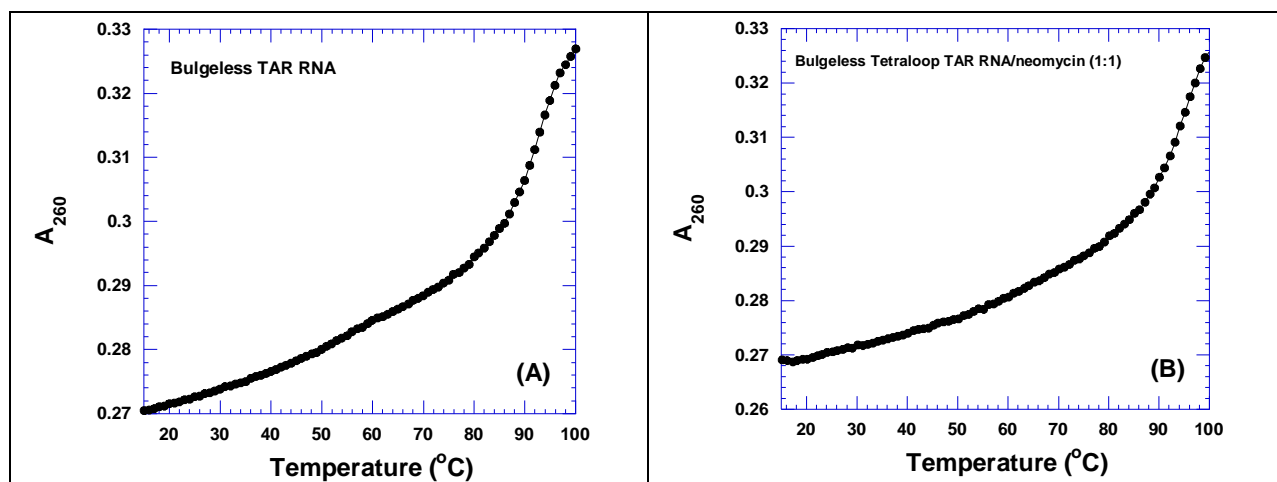

**Figure S3.9.** UV thermal denaturation profile of the bulgeless TAR RNA mutant with no drug (A), and with 1  $\mu\text{M}$  (1 mol. eq.) neomycin (B). Buffer conditions: 100 mM KCl, 10 mM SC, 0.5 mM EDTA, pH 6.8. [HIV TAR RNA] = 1  $\mu\text{M}$ /strand. The heating rate was 0.3  $^{\circ}\text{C}$ . Absorbance was recorded at 260nm.



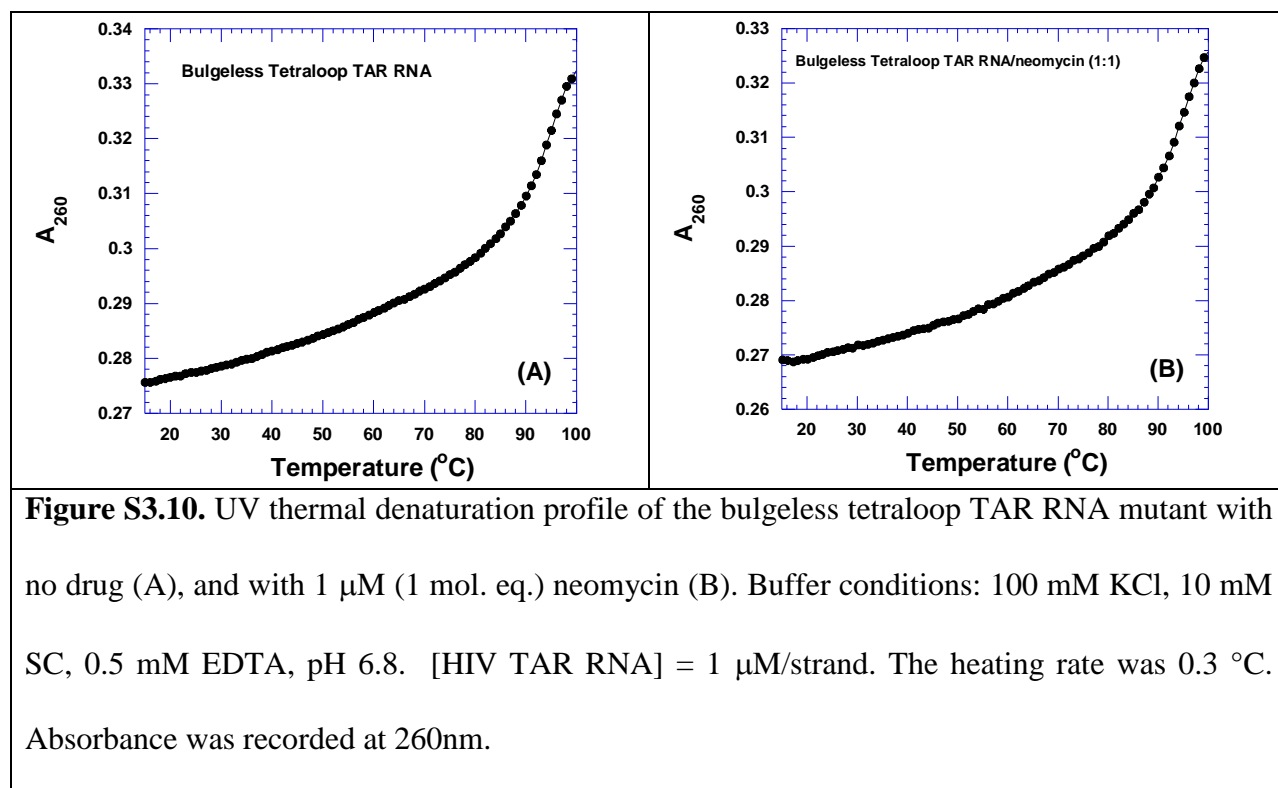

#### **S4. Mutant TAR RNA Ethidium Bromide Displacement Assays.**

The IC<sub>50</sub> plots shown use concentrations expressed as r<sub>dr</sub> (ratio of drug to RNA). All ethidium bromide displacement assays used the same 200 nM/strand RNA concentration, therefore the IC<sub>50</sub> values can be converted from r<sub>dr</sub> to nM by multiplying the r<sub>dr</sub> by the RNA concentration used (200 nM/strand).

$$\text{IC}_{50} \text{ (nM)} = [\text{Ratio of drug to RNA}] \times [\text{RNA Concentration}]$$

$$\text{IC}_{50} \text{ (nM)} = r_{\text{dr}} \times 200 \text{ nM/strand}$$

## Bulgeless TAR RNA Mutant Ethidium Bromide Displacement Binding Assay

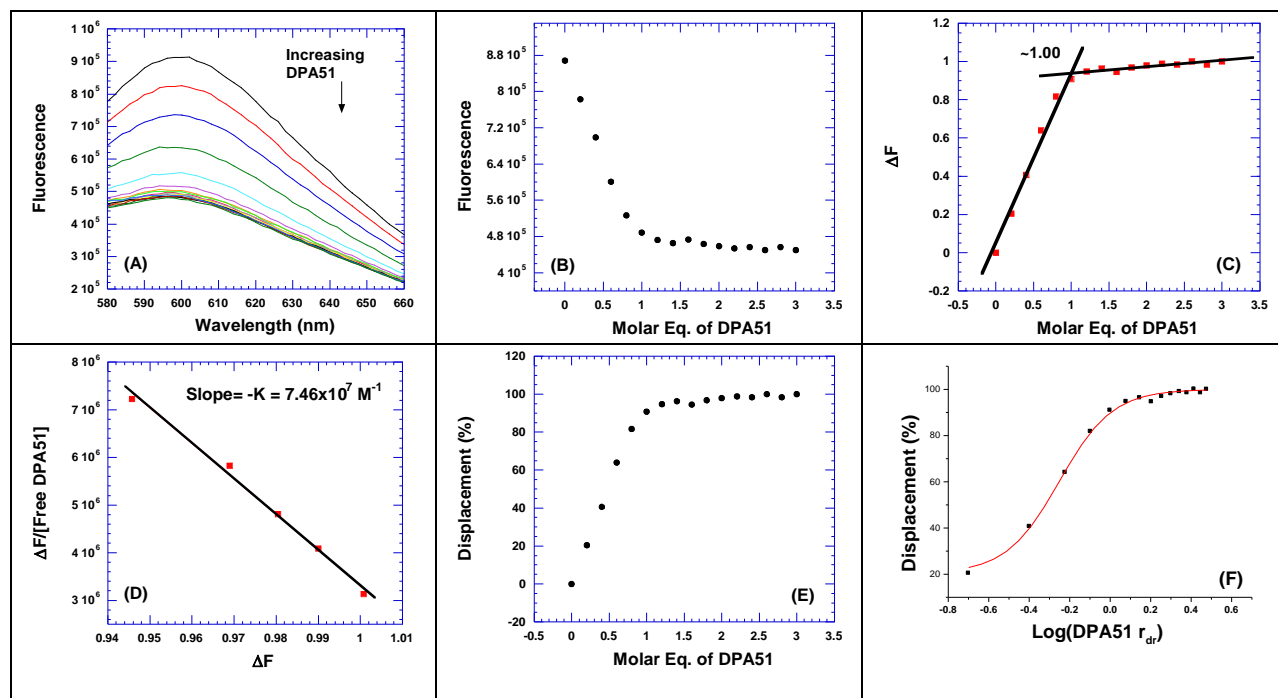

**Figure S4.1.** FID titration of **DPA51** with the **bulgeless TAR RNA mutant**. Raw fluorescence emission spectra in the presence of increasing concentration of **DPA51** (A). The decrease of fluorescence intensity (at 610 nm) of the bulgeless TAR RNA mutant/EtBr complex with increasing concentration of **DPA51** results in a saturating binding plot (B). The plot between normalized fluorescence intensity (at 610 nm) of the bulgeless TAR RNA mutant-EtBr complex as a function of concentration of **DPA51** results in a saturating binding plot (C). The Scatchard plot analysis of **DPA51** with the bulgeless TAR RNA mutant (D). The plot between normalized EtBr displacement (at 610 nm) of the bulgeless TAR RNA mutant-EtBr complex as a function of concentration of **DPA51** (E). The plot for EtBr displacement (%) of the bulgeless TAR RNA mutant-EtBr complex versus the log of the **DPA51**  $r_{dr}$ , the data shown with a sigmoidal fit, was used to determine the  $IC_{50}$  value (F). Buffer conditions: 100 mM KCl, 10 mM SC, 0.5 mM EDTA, pH 6.8. Bulgeless TAR RNA mutant = 200 nM/strand. [EtBr] = 5  $\mu$ M.

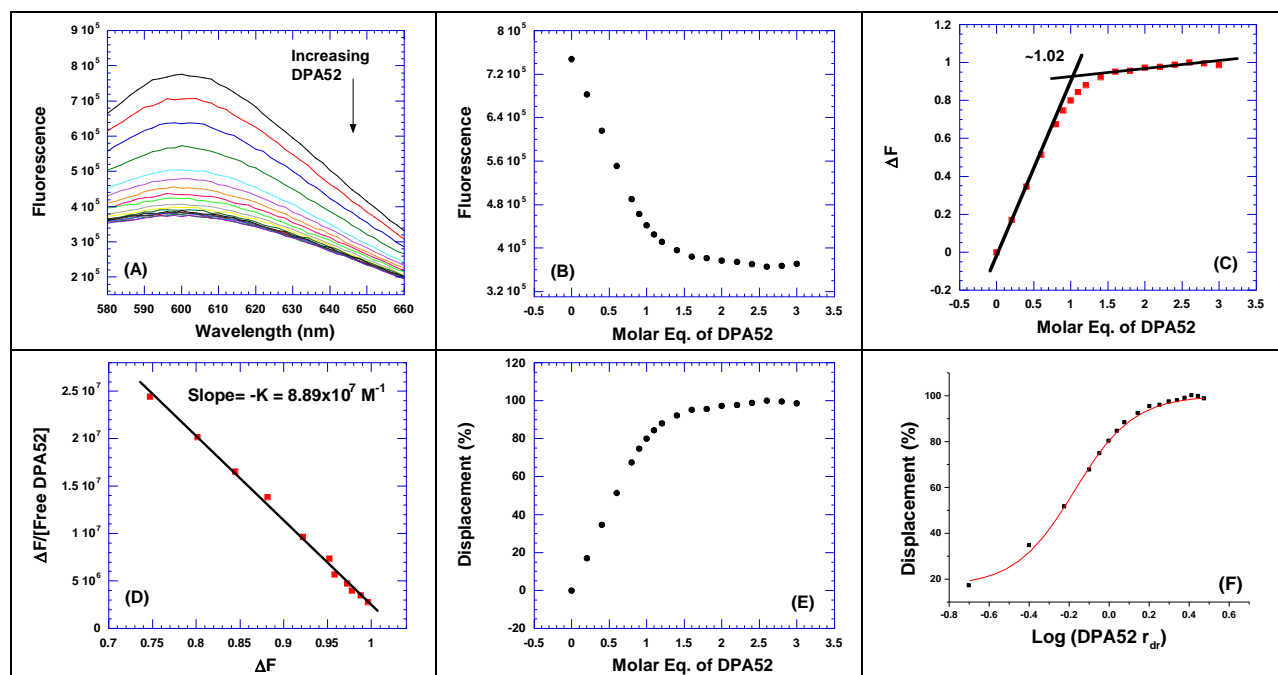

**Figure S4.2.** FID titration of **DPA52** with the **bulgeless TAR RNA mutant**. Raw fluorescence emission spectra in the presence of increasing concentration of **DPA52** (A). The decrease of fluorescence intensity (at 610 nm) of the bulgeless TAR RNA mutant/EtBr complex with increasing concentration of **DPA52** results in a saturating binding plot (B). The plot between normalized fluorescence intensity (at 610 nm) of the bulgeless TAR RNA mutant-EtBr complex as a function of concentration of **DPA52** results in a saturating binding plot (C). The Scatchard plot analysis of **DPA52** with the bulgeless TAR RNA mutant (D). The plot between normalized EtBr displacement (at 610 nm) of the bulgeless TAR RNA mutant-EtBr complex as a function of concentration of **DPA52** (E). The plot for EtBr displacement (%) of the bulgeless TAR RNA mutant-EtBr complex versus the log of the **DPA52**  $r_{dr}$ , the data shown with a sigmoidal fit, was used to determine the  $IC_{50}$  value (F). Buffer conditions: 100 mM KCl, 10 mM SC, 0.5 mM EDTA, pH 6.8. Bulgeless TAR RNA mutant = 200 nM/strand. [EtBr] = 5  $\mu$ M.

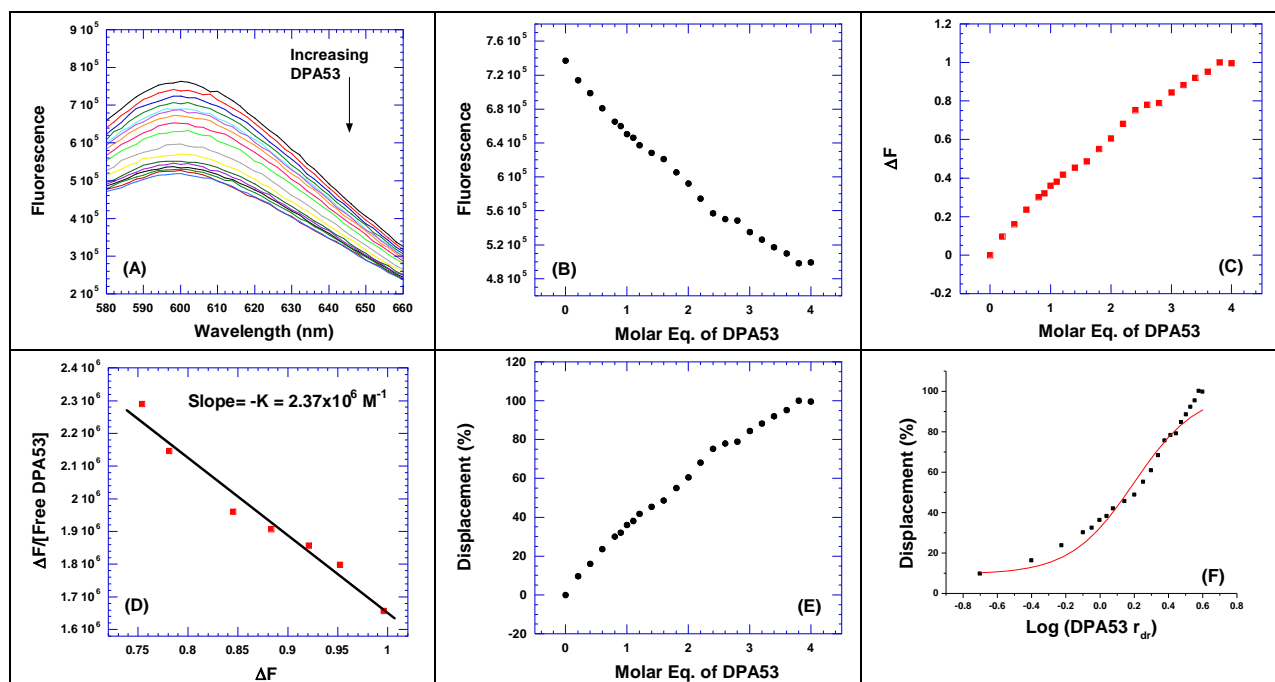

**Figure S4.3.** FID titration of **DPA53** with the **bulgeless TAR RNA mutant**. Raw fluorescence emission spectra in the presence of increasing concentration of **DPA53** (A). The decrease of fluorescence intensity (at 610 nm) of the bulgeless TAR RNA mutant/EtBr complex with increasing concentration of **DPA53** results in a saturating binding plot (B). The plot between normalized fluorescence intensity (at 610 nm) of the bulgeless TAR RNA mutant-EtBr complex as a function of concentration of **DPA53** results in a saturating binding plot (C). The Scatchard plot analysis of **DPA53** with the bulgeless TAR RNA mutant (D). The plot between normalized EtBr displacement (at 610 nm) of the bulgeless TAR RNA mutant-EtBr complex as a function of concentration of **DPA53** (E). The plot for EtBr displacement (%) of the bulgeless TAR RNA mutant-EtBr complex versus the log of the **DPA53**  $r_{dr}$ , the data shown with a sigmoidal fit, was used to determine the  $IC_{50}$  value (F). Buffer conditions: 100 mM KCl, 10 mM SC, 0.5 mM EDTA, pH 6.8. Bulgeless TAR RNA mutant = 200 nM/strand. [EtBr] = 5  $\mu$ M.

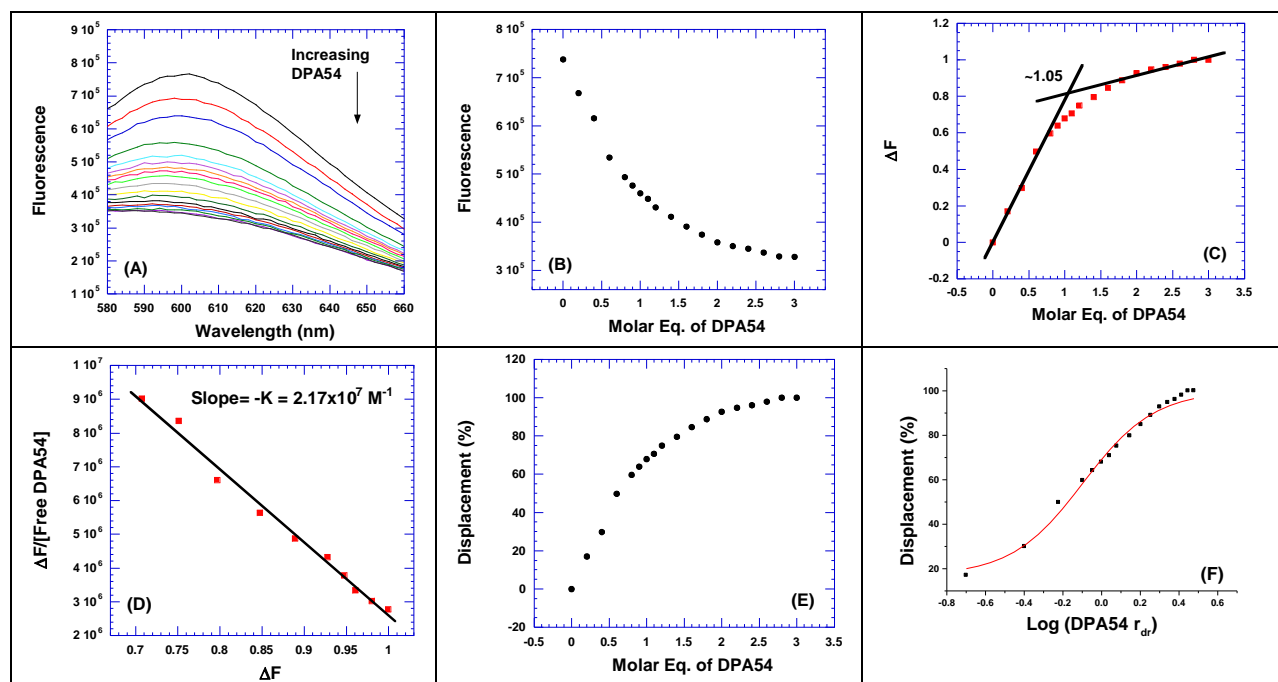

**Figure S4.4.** FID titration of **DPA54** with the **bulgeless TAR RNA mutant**. Raw fluorescence emission spectra in the presence of increasing concentration of **DPA54** (A). The decrease of fluorescence intensity (at 610 nm) of the bulgeless TAR RNA mutant/EtBr complex with increasing concentration of **DPA54** results in a saturating binding plot (B). The plot between normalized fluorescence intensity (at 610 nm) of the bulgeless TAR RNA mutant-EtBr complex as a function of concentration of **DPA54** results in a saturating binding plot (C). The Scatchard plot analysis of **DPA54** with the bulgeless TAR RNA mutant (D). The plot between normalized EtBr displacement (at 610 nm) of the bulgeless TAR RNA mutant-EtBr complex as a function of concentration of **DPA54** (E). The plot for EtBr displacement (%) of the bulgeless TAR RNA mutant-EtBr complex versus the log of the **DPA54**  $r_{dr}$ , the data shown with a sigmoidal fit, was used to determine the  $IC_{50}$  value (F). Buffer conditions: 100 mM KCl, 10 mM SC, 0.5 mM EDTA, pH 6.8. Bulgeless TAR RNA mutant = 200 nM/strand. [EtBr] = 5  $\mu$ M.

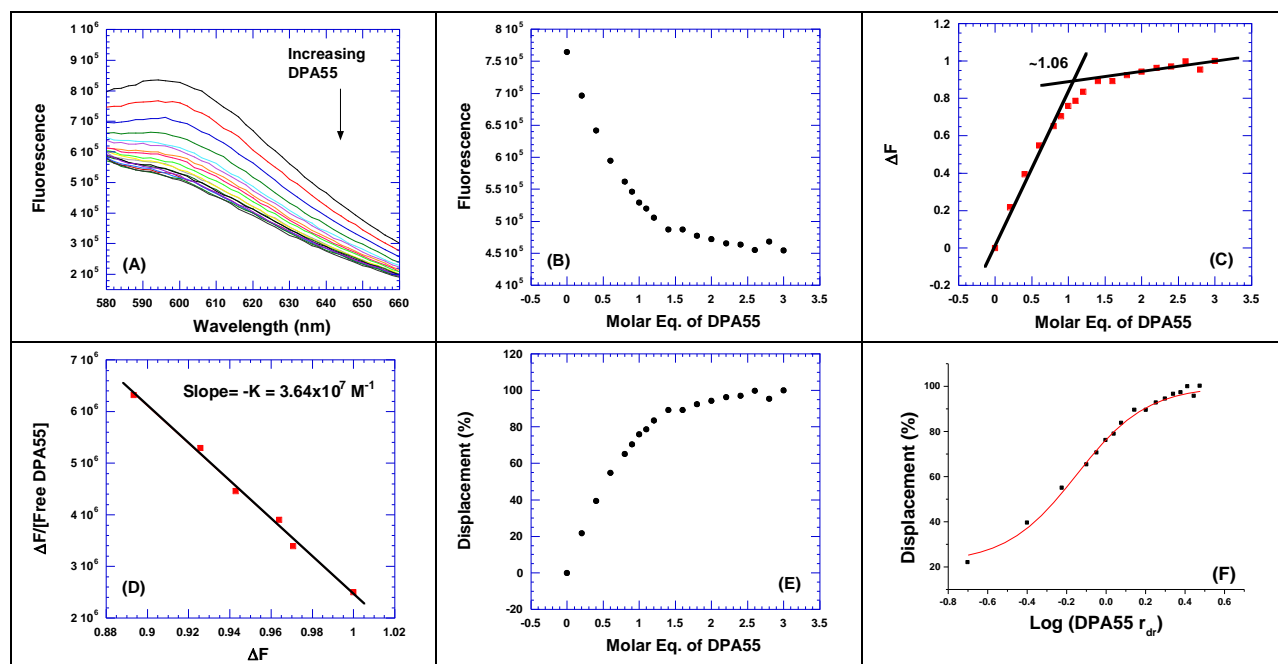

**Figure S4.5.** FID titration of **DPA55** with the **bulgeless TAR RNA mutant**. Raw fluorescence emission spectra in the presence of increasing concentration of **DPA55** (A). The decrease of fluorescence intensity (at 610 nm) of the bulgeless TAR RNA mutant/EtBr complex with increasing concentration of **DPA55** results in a saturating binding plot (B). The plot between normalized fluorescence intensity (at 610 nm) of the bulgeless TAR RNA mutant-EtBr complex as a function of concentration of **DPA55** results in a saturating binding plot (C). The Scatchard plot analysis of **DPA55** with the bulgeless TAR RNA mutant (D). The plot between normalized EtBr displacement (at 610 nm) of the bulgeless TAR RNA mutant-EtBr complex as a function of concentration of **DPA55** (E). The plot for EtBr displacement (%) of the bulgeless TAR RNA mutant-EtBr complex versus the log of the **DPA55**  $r_{dr}$ , the data shown with a sigmoidal fit, was used to determine the  $IC_{50}$  value (F). Buffer conditions: 100 mM KCl, 10 mM SC, 0.5 mM EDTA, pH 6.8. Bulgeless TAR RNA mutant = 200 nM/strand. [EtBr] = 5  $\mu$ M.

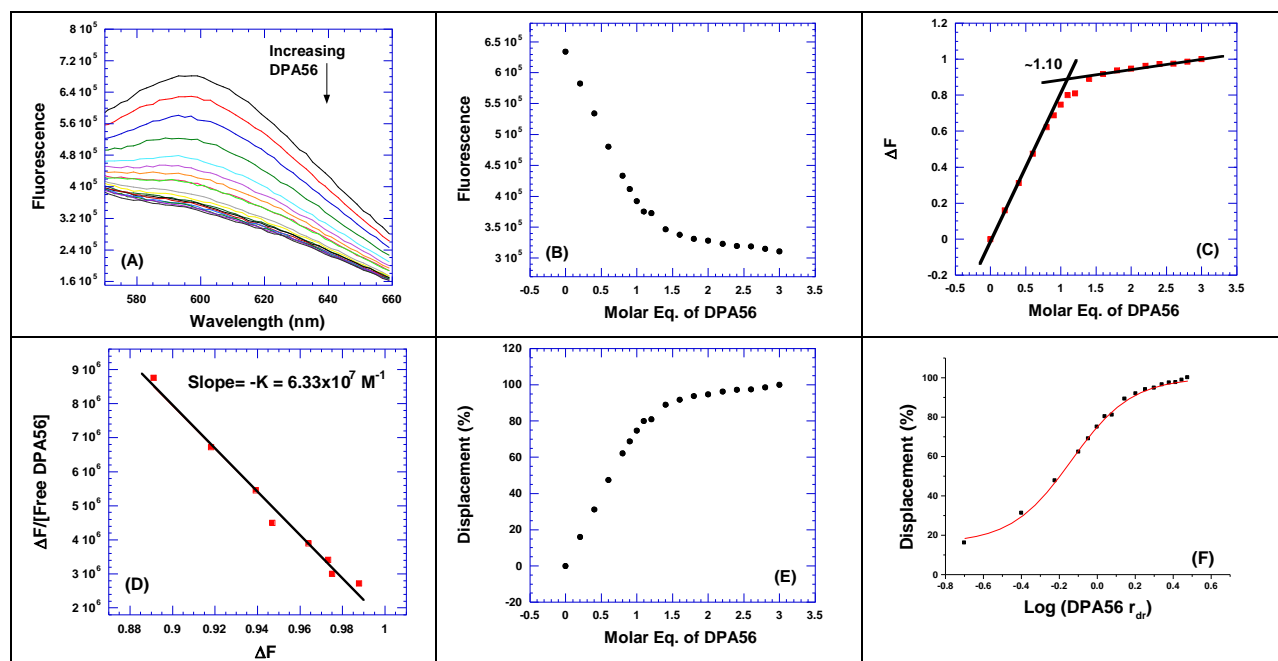

**Figure S4.6.** FID titration of **DPA56** with the **bulgeless TAR RNA mutant**. Raw fluorescence emission spectra in the presence of increasing concentration of **DPA56** (A). The decrease of fluorescence intensity (at 610 nm) of the bulgeless TAR RNA mutant/EtBr complex with increasing concentration of **DPA56** results in a saturating binding plot (B). The plot between normalized fluorescence intensity (at 610 nm) of the bulgeless TAR RNA mutant-EtBr complex as a function of concentration of **DPA56** results in a saturating binding plot (C). The Scatchard plot analysis of **DPA56** with the bulgeless TAR RNA mutant (D). The plot between normalized EtBr displacement (at 610 nm) of the bulgeless TAR RNA mutant-EtBr complex as a function of concentration of **DPA56** (E). The plot for EtBr displacement (%) of the bulgeless TAR RNA mutant-EtBr complex versus the log of the **DPA56**  $r_{dr}$ , the data shown with a sigmoidal fit, was used to determine the  $IC_{50}$  value (F). Buffer conditions: 100 mM KCl, 10 mM SC, 0.5 mM EDTA, pH 6.8. Bulgeless TAR RNA mutant = 200 nM/strand. [EtBr] = 5  $\mu$ M.



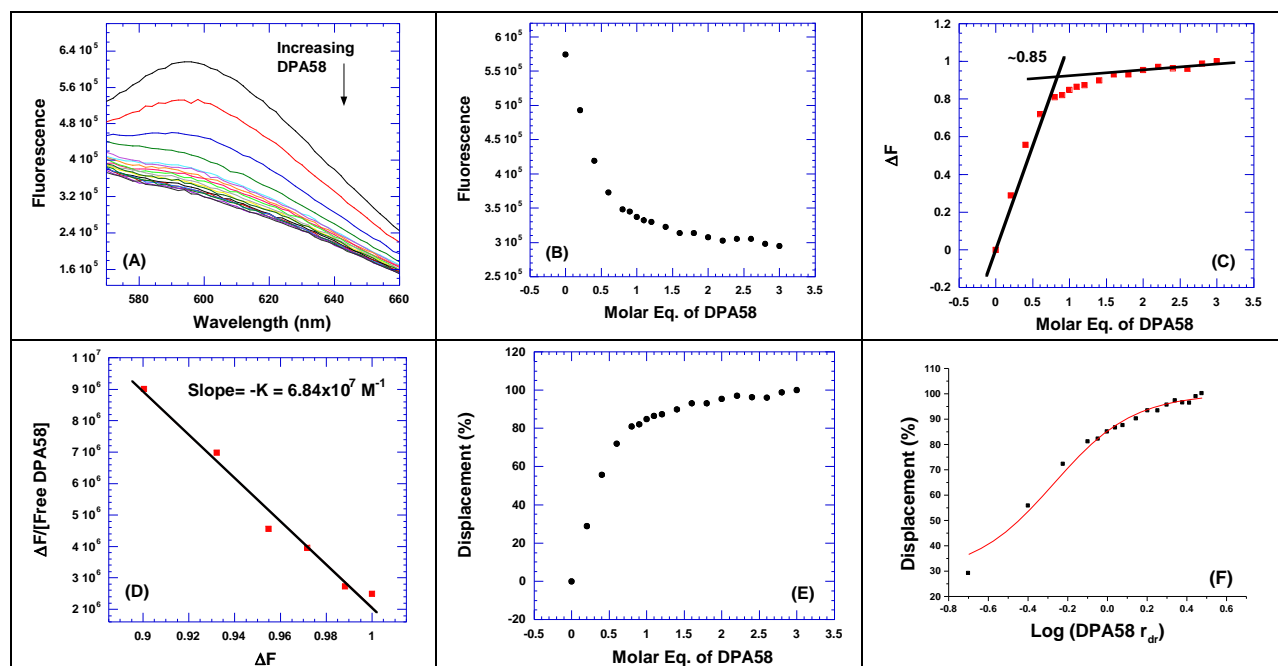

**Figure S4.7.** FID titration of **DPA58** with the **bulgeless TAR RNA mutant**. Raw fluorescence emission spectra in the presence of increasing concentration of **DPA58** (A). The decrease of fluorescence intensity (at 610 nm) of the bulgeless TAR RNA mutant/EtBr complex with increasing concentration of **DPA58** results in a saturating binding plot (B). The plot between normalized fluorescence intensity (at 610 nm) of the bulgeless TAR RNA mutant-EtBr complex as a function of concentration of **DPA58** results in a saturating binding plot (C). The Scatchard plot analysis of **DPA58** with the bulgeless TAR RNA mutant (D). The plot between normalized EtBr displacement (at 610 nm) of the bulgeless TAR RNA mutant-EtBr complex as a function of concentration of **DPA58** (E). The plot for EtBr displacement (%) of the bulgeless TAR RNA mutant-EtBr complex versus the log of the **DPA58**  $r_{dr}$ , the data shown with a sigmoidal fit, was used to determine the  $IC_{50}$  value (F). Buffer conditions: 100 mM KCl, 10 mM SC, 0.5 mM EDTA, pH 6.8. Bulgeless TAR RNA mutant = 200 nM/strand. [EtBr] = 5  $\mu$ M.

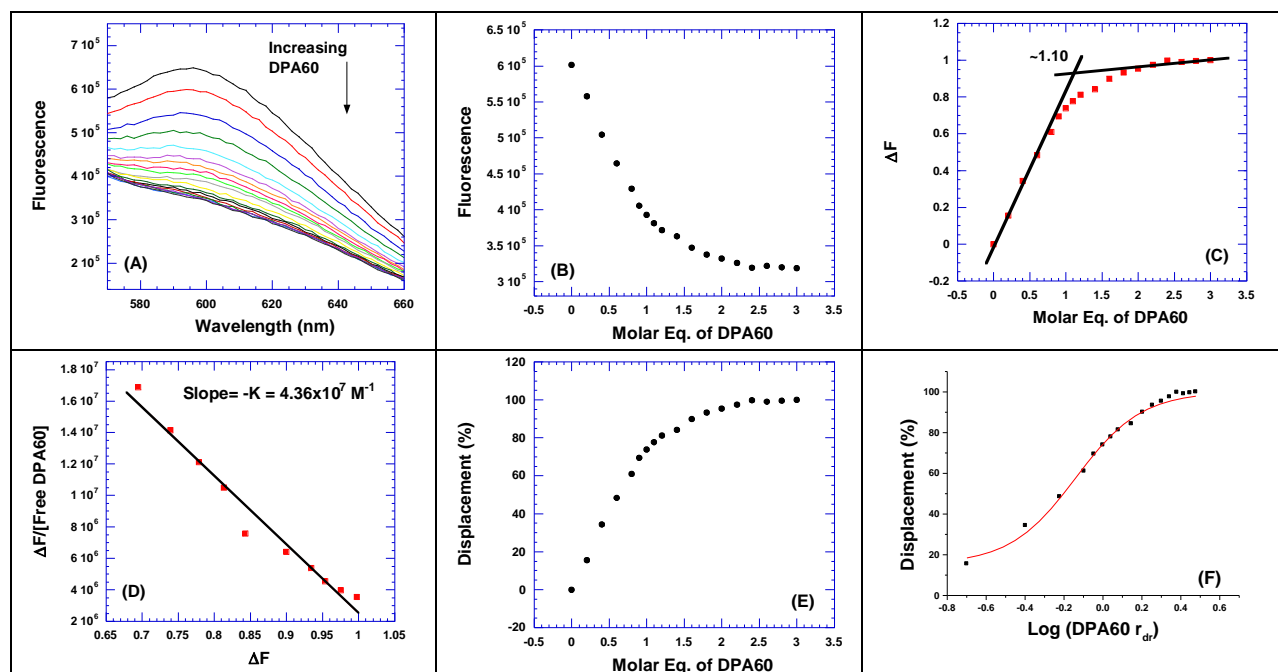

**Figure S4.8.** FID titration of **DPA60** with the **bulgeless TAR RNA mutant**. Raw fluorescence emission spectra in the presence of increasing concentration of **DPA60** (A). The decrease of fluorescence intensity (at 610 nm) of the bulgeless TAR RNA mutant/EtBr complex with increasing concentration of **DPA60** results in a saturating binding plot (B). The plot between normalized fluorescence intensity (at 610 nm) of the bulgeless TAR RNA mutant-EtBr complex as a function of concentration of **DPA60** results in a saturating binding plot (C). The Scatchard plot analysis of **DPA60** with the bulgeless TAR RNA mutant (D). The plot between normalized EtBr displacement (at 610 nm) of the bulgeless TAR RNA mutant-EtBr complex as a function of concentration of **DPA60** (E). The plot for EtBr displacement (%) of the bulgeless TAR RNA mutant-EtBr complex versus the log of the **DPA60**  $r_{dr}$ , the data shown with a sigmoidal fit, was used to determine the  $IC_{50}$  value (F). Buffer conditions: 100 mM KCl, 10 mM SC, 0.5 mM EDTA, pH 6.8. Bulgeless TAR RNA mutant = 200 nM/strand. [EtBr] = 5  $\mu$ M.

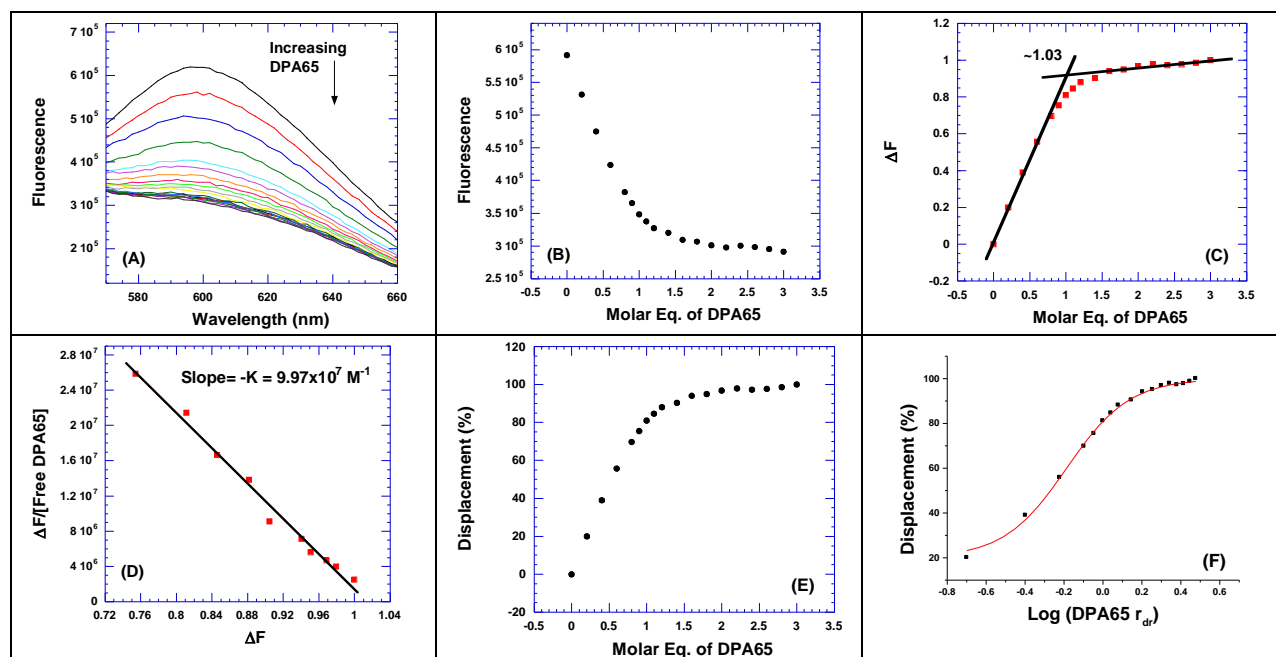

**Figure S4.9.** FID titration of **DPA65** with the **bulgeless TAR RNA mutant**. Raw fluorescence emission spectra in the presence of increasing concentration of **DPA65** (A). The decrease of fluorescence intensity (at 610 nm) of the bulgeless TAR RNA mutant/EtBr complex with increasing concentration of **DPA65** results in a saturating binding plot (B). The plot between normalized fluorescence intensity (at 610 nm) of the bulgeless TAR RNA mutant-EtBr complex as a function of concentration of **DPA65** results in a saturating binding plot (C). The Scatchard plot analysis of **DPA65** with the bulgeless TAR RNA mutant (D). The plot between normalized EtBr displacement (at 610 nm) of the bulgeless TAR RNA mutant-EtBr complex as a function of concentration of **DPA65** (E). The plot for EtBr displacement (%) of the bulgeless TAR RNA mutant-EtBr complex versus the log of the **DPA65**  $r_{dr}$ , the data shown with a sigmoidal fit, was used to determine the  $IC_{50}$  value (F). Buffer conditions: 100 mM KCl, 10 mM SC, 0.5 mM EDTA, pH 6.8. Bulgeless TAR RNA mutant = 200 nM/strand. [EtBr] = 5  $\mu$ M.

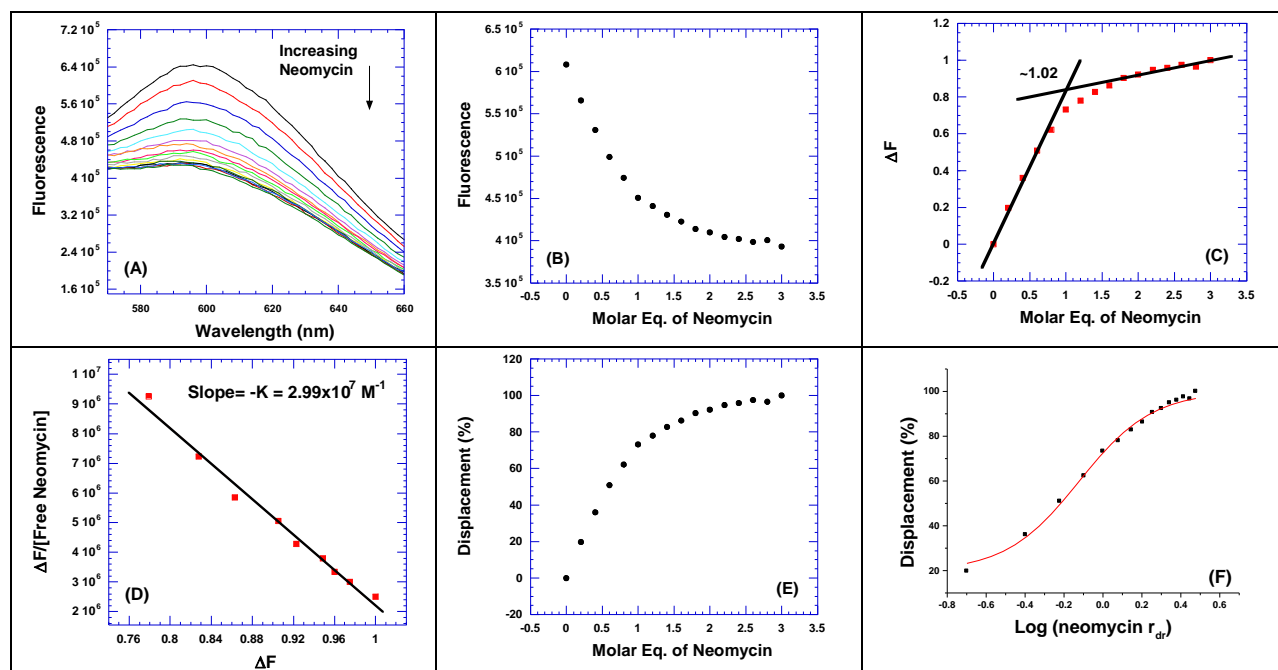

**Figure S4.10.** FID titration of **neomycin** with the **bulgeless TAR RNA mutant**. Raw fluorescence emission spectra in the presence of increasing concentration of **neomycin** (A). The decrease of fluorescence intensity (at 610 nm) of the bulgeless TAR RNA mutant/EtBr complex with increasing concentration of **neomycin** results in a saturating binding plot (B). The plot between normalized fluorescence intensity (at 610 nm) of the bulgeless TAR RNA mutant-EtBr complex as a function of concentration of **neomycin** results in a saturating binding plot (C). The Scatchard plot analysis of **neomycin** with the bulgeless TAR RNA mutant (D). The plot between normalized EtBr displacement (at 610 nm) of the bulgeless TAR RNA mutant-EtBr complex as a function of concentration of **neomycin** (E). The plot for EtBr displacement (%) of the bulgeless TAR RNA mutant-EtBr complex versus the log of the **neomycin**  $r_{dr}$ , the data shown with a sigmoidal fit, was used to determine the  $IC_{50}$  value (F). Buffer conditions: 100 mM KCl, 10 mM SC, 0.5 mM EDTA, pH 6.8. Bulgeless TAR RNA mutant = 200 nM/strand. [EtBr] = 5  $\mu$ M.

# Tetraloop TAR RNA Mutant Ethidium Bromide Displacement Binding Assay

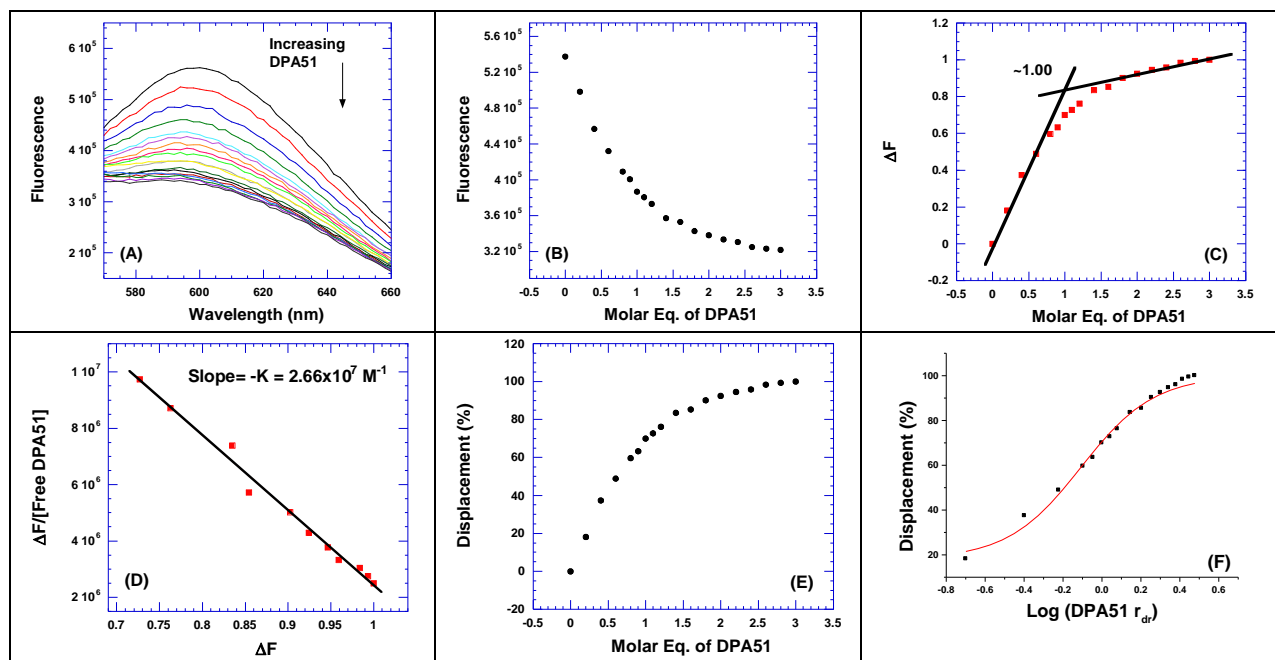

**Figure S4.11.** FID titration of **DPA51** with the **tetraloop TAR RNA mutant**. Raw fluorescence emission spectra in the presence of increasing concentration of **DPA51** (A). The decrease of fluorescence intensity (at 610 nm) of the tetraloop TAR RNA mutant/EtBr complex with increasing concentration of **DPA51** results in a saturating binding plot (B). The plot between normalized fluorescence intensity (at 610 nm) of the tetraloop TAR RNA mutant-EtBr complex as a function of concentration of **DPA51** results in a saturating binding plot (C). The Scatchard plot analysis of **DPA51** with the tetraloop TAR RNA mutant (D). The plot between normalized EtBr displacement (at 610 nm) of the tetraloop TAR RNA mutant-EtBr complex as a function of concentration of **DPA51** (E). The plot for EtBr displacement (%) of the tetraloop TAR RNA mutant-EtBr complex versus the log of the **DPA51**  $r_{dr}$ , the data shown with a sigmoidal fit, was used to determine the  $IC_{50}$  value (F). Buffer conditions: 100 mM KCl, 10 mM SC, 0.5 mM EDTA, pH 6.8. Tetraloop TAR RNA mutant = 200 nM/strand. [EtBr] = 5  $\mu$ M.

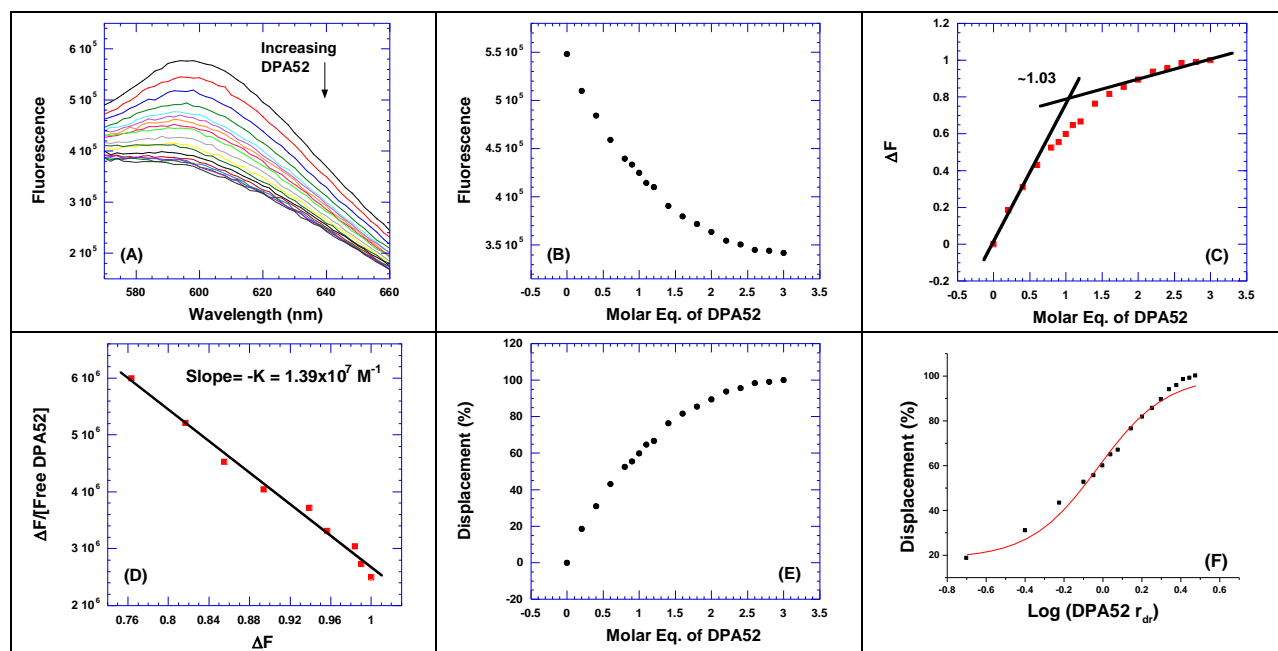

**Figure S4.12.** FID titration of **DPA52** with the **tetraloop TAR RNA mutant**. Raw fluorescence emission spectra in the presence of increasing concentration of **DPA52** (A). The decrease of fluorescence intensity (at 610 nm) of the tetraloop TAR RNA mutant/EtBr complex with increasing concentration of **DPA52** results in a saturating binding plot (B). The plot between normalized fluorescence intensity (at 610 nm) of the tetraloop TAR RNA mutant-EtBr complex as a function of concentration of **DPA52** results in a saturating binding plot (C). The Scatchard plot analysis of **DPA52** with the tetraloop TAR RNA mutant (D). The plot between normalized EtBr displacement (at 610 nm) of the tetraloop TAR RNA mutant-EtBr complex as a function of concentration of **DPA52** (E). The plot for EtBr displacement (%) of the tetraloop TAR RNA mutant-EtBr complex versus the log of the **DPA52**  $r_{dr}$ , the data shown with a sigmoidal fit, was used to determine the  $IC_{50}$  value (F). Buffer conditions: 100 mM KCl, 10 mM SC, 0.5 mM EDTA, pH 6.8. Tetraloop TAR RNA mutant = 200 nM/strand. [EtBr] = 5  $\mu$ M.

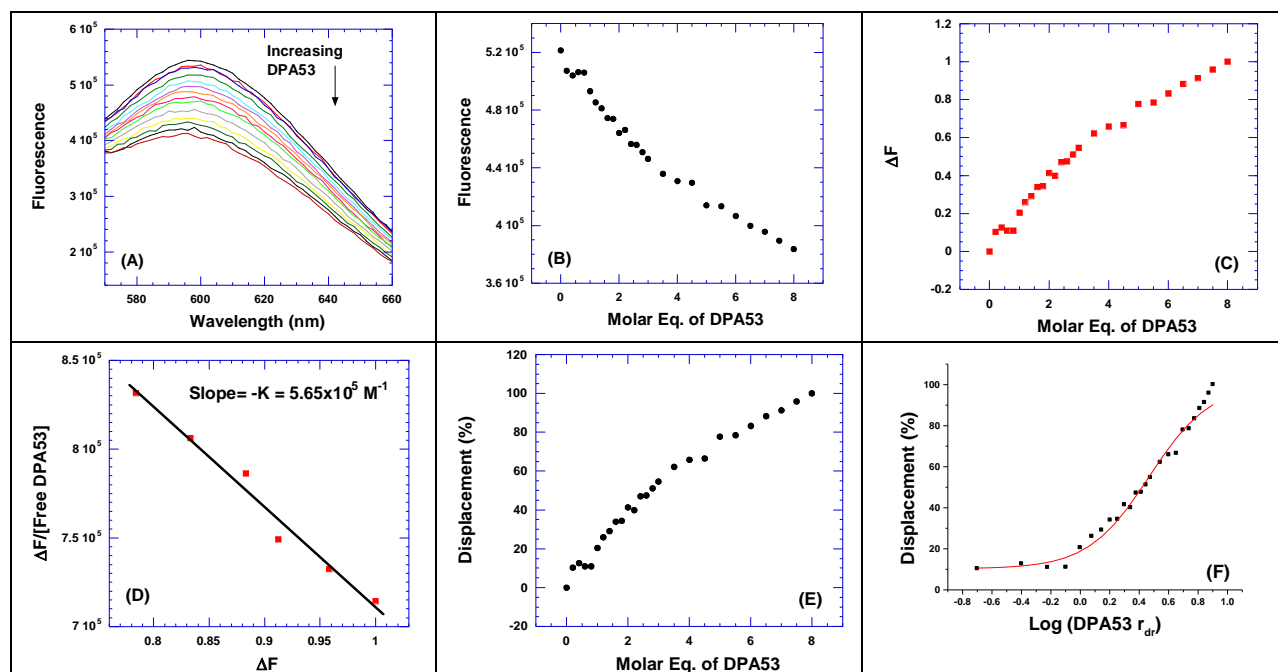

**Figure S4.13.** FID titration of **DPA53** with the **tetraloop TAR RNA mutant**. Raw fluorescence emission spectra in the presence of increasing concentration of **DPA53** (A). The decrease of fluorescence intensity (at 610 nm) of the tetraloop TAR RNA mutant/EtBr complex with increasing concentration of **DPA53** results in a saturating binding plot (B). The plot between normalized fluorescence intensity (at 610 nm) of the tetraloop TAR RNA mutant-EtBr complex as a function of concentration of **DPA53** results in a saturating binding plot (C). The Scatchard plot analysis of **DPA53** with the tetraloop TAR RNA mutant (D). The plot between normalized EtBr displacement (at 610 nm) of the tetraloop TAR RNA mutant-EtBr complex as a function of concentration of **DPA53** (E). The plot for EtBr displacement (%) of the tetraloop TAR RNA mutant-EtBr complex versus the log of the **DPA53**  $r_{dr}$ , the data shown with a sigmoidal fit, was used to determine the  $IC_{50}$  value (F). Buffer conditions: 100 mM KCl, 10 mM SC, 0.5 mM EDTA, pH 6.8. Tetraloop TAR RNA mutant = 200 nM/strand. [EtBr] = 5  $\mu$ M.

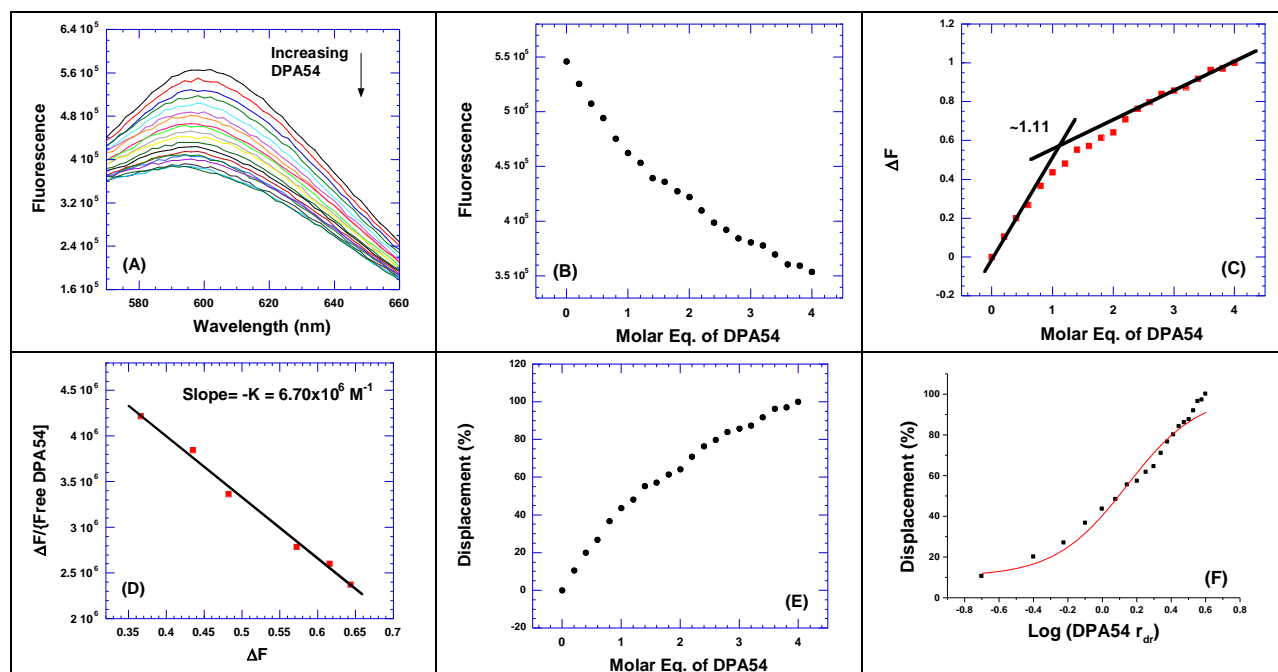

**Figure S4.14.** FID titration of **DPA54** with the **tetraloop TAR RNA mutant**. Raw fluorescence emission spectra in the presence of increasing concentration of **DPA54** (A). The decrease of fluorescence intensity (at 610 nm) of the tetraloop TAR RNA mutant/EtBr complex with increasing concentration of **DPA54** results in a saturating binding plot (B). The plot between normalized fluorescence intensity (at 610 nm) of the tetraloop TAR RNA mutant-EtBr complex as a function of concentration of **DPA54** results in a saturating binding plot (C). The Scatchard plot analysis of **DPA54** with the tetraloop TAR RNA mutant (D). The plot between normalized EtBr displacement (at 610 nm) of the tetraloop TAR RNA mutant-EtBr complex as a function of concentration of **DPA54** (E). The plot for EtBr displacement (%) of the tetraloop TAR RNA mutant-EtBr complex versus the log of the **DPA54**  $r_{dr}$ , the data shown with a sigmoidal fit, was used to determine the  $IC_{50}$  value (F). Buffer conditions: 100 mM KCl, 10 mM SC, 0.5 mM EDTA, pH 6.8. Tetraloop TAR RNA mutant = 200 nM/strand. [EtBr] = 5  $\mu$ M.



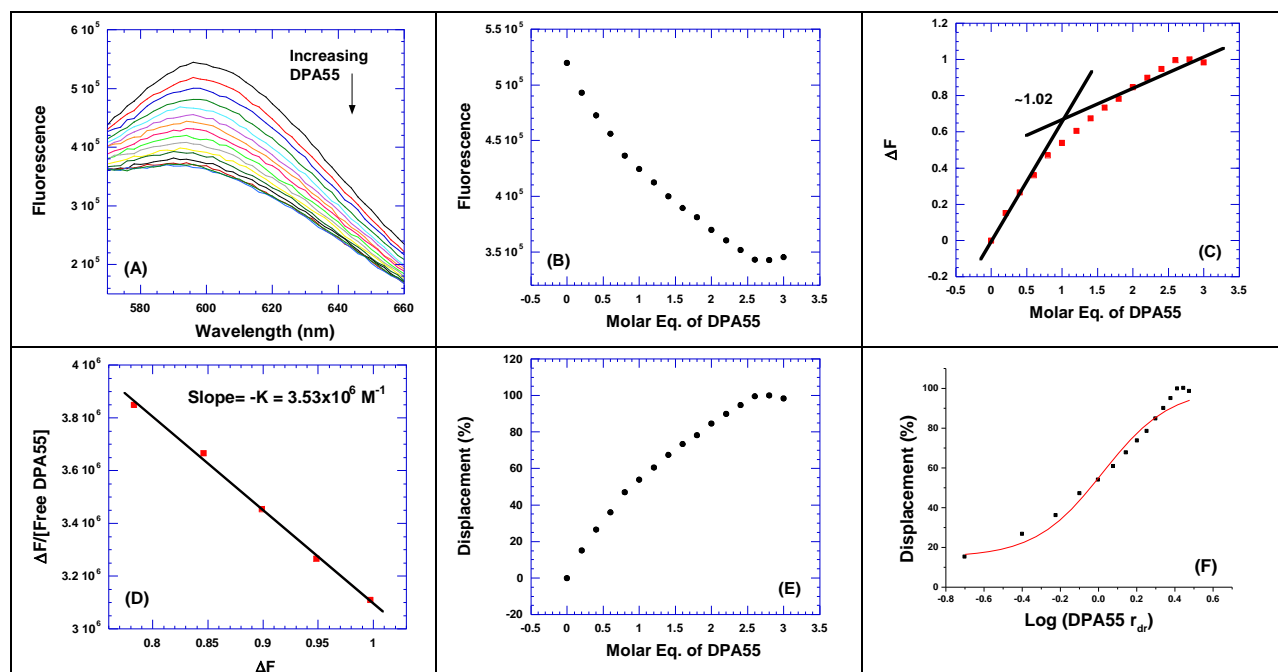

**Figure S4.15.** FID titration of **DPA55** with the **tetraloop TAR RNA mutant**. Raw fluorescence emission spectra in the presence of increasing concentration of **DPA55** (A). The decrease of fluorescence intensity (at 610 nm) of the tetraloop TAR RNA mutant/EtBr complex with increasing concentration of **DPA55** results in a saturating binding plot (B). The plot between normalized fluorescence intensity (at 610 nm) of the tetraloop TAR RNA mutant-EtBr complex as a function of concentration of **DPA55** results in a saturating binding plot (C). The Scatchard plot analysis of **DPA55** with the tetraloop TAR RNA mutant (D). The plot between normalized EtBr displacement (at 610 nm) of the tetraloop TAR RNA mutant-EtBr complex as a function of concentration of **DPA55** (E). The plot for EtBr displacement (%) of the tetraloop TAR RNA mutant-EtBr complex versus the log of the **DPA55**  $r_{dr}$ , the data shown with a sigmoidal fit, was used to determine the  $IC_{50}$  value (F). Buffer conditions: 100 mM KCl, 10 mM SC, 0.5 mM EDTA, pH 6.8. Tetraloop TAR RNA mutant = 200 nM/strand. [EtBr] = 5  $\mu$ M.

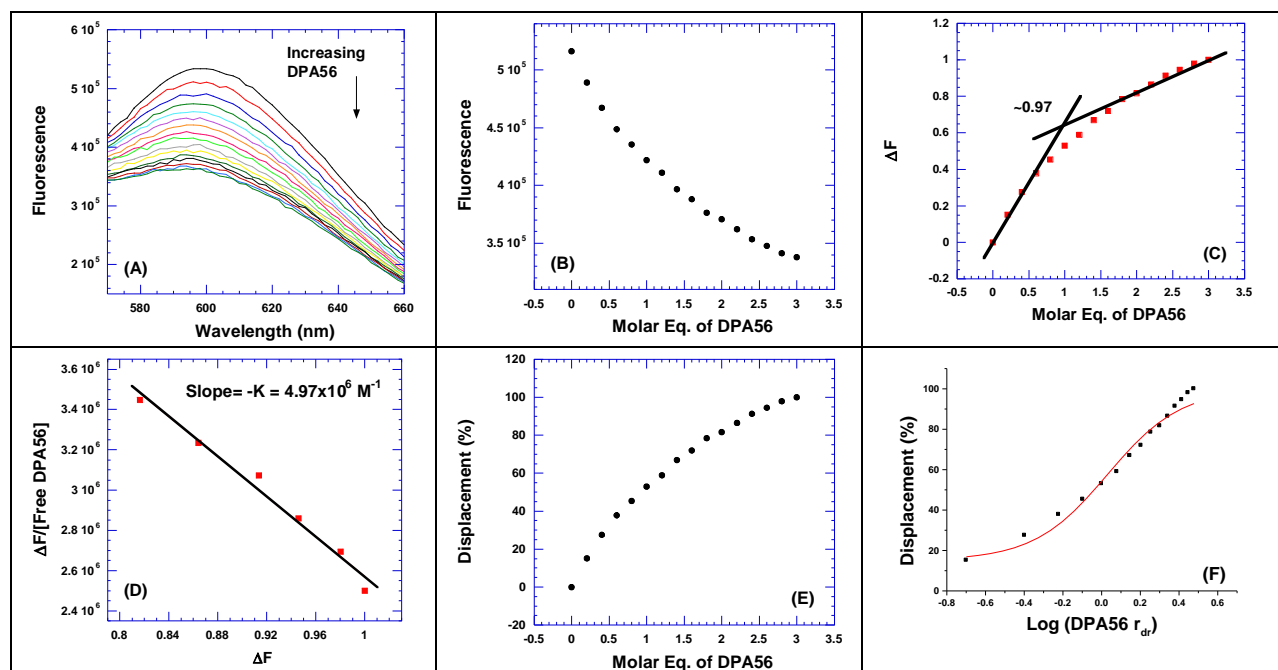

**Figure S4.16.** FID titration of **DPA56** with the **tetraloop TAR RNA mutant**. Raw fluorescence emission spectra in the presence of increasing concentration of **DPA56** (A). The decrease of fluorescence intensity (at 610 nm) of the tetraloop TAR RNA mutant/EtBr complex with increasing concentration of **DPA56** results in a saturating binding plot (B). The plot between normalized fluorescence intensity (at 610 nm) of the tetraloop TAR RNA mutant-EtBr complex as a function of concentration of **DPA56** results in a saturating binding plot (C). The Scatchard plot analysis of **DPA56** with the tetraloop TAR RNA mutant (D). The plot between normalized EtBr displacement (at 610 nm) of the tetraloop TAR RNA mutant-EtBr complex as a function of concentration of **DPA56** (E). The plot for EtBr displacement (%) of the tetraloop TAR RNA mutant-EtBr complex versus the log of the **DPA56**  $r_{dr}$ , the data shown with a sigmoidal fit, was used to determine the  $IC_{50}$  value (F). Buffer conditions: 100 mM KCl, 10 mM SC, 0.5 mM EDTA, pH 6.8. Tetraloop TAR RNA mutant = 200 nM/strand. [EtBr] = 5  $\mu$ M.

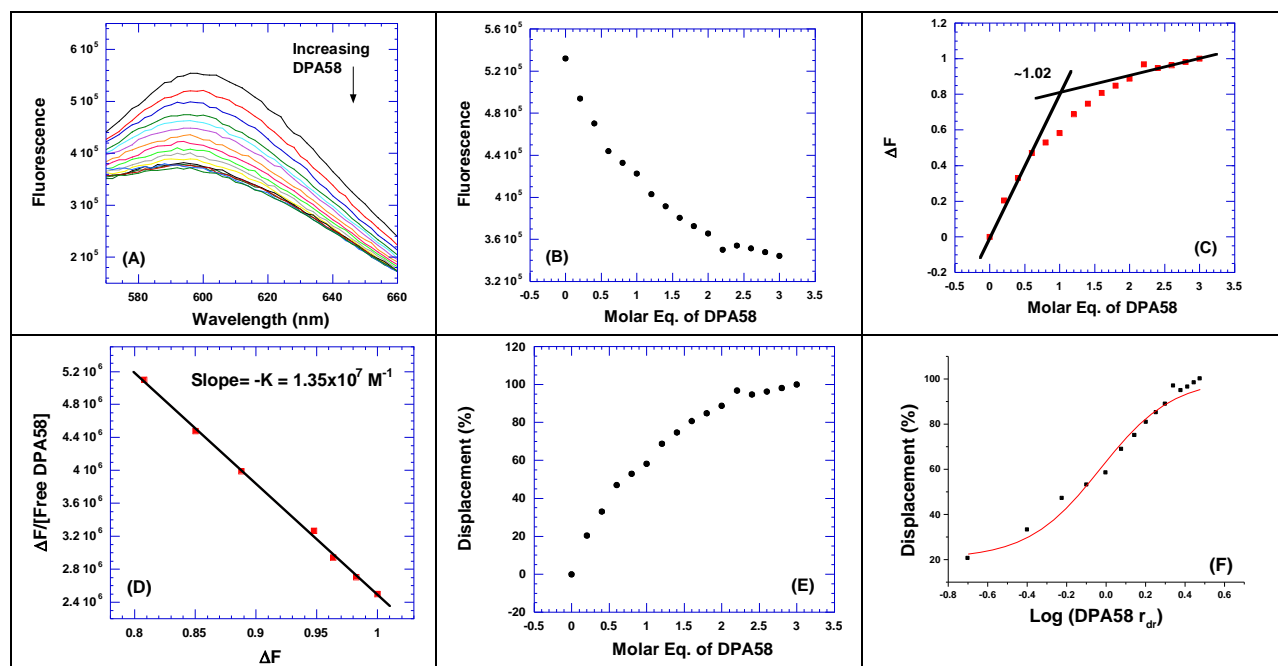

**Figure S4.17.** FID titration of **DPA58** with the **tetraloop TAR RNA mutant**. Raw fluorescence emission spectra in the presence of increasing concentration of **DPA58** (A). The decrease of fluorescence intensity (at 610 nm) of the tetraloop TAR RNA mutant/EtBr complex with increasing concentration of **DPA58** results in a saturating binding plot (B). The plot between normalized fluorescence intensity (at 610 nm) of the tetraloop TAR RNA mutant-EtBr complex as a function of concentration of **DPA58** results in a saturating binding plot (C). The Scatchard plot analysis of **DPA58** with the tetraloop TAR RNA mutant (D). The plot between normalized EtBr displacement (at 610 nm) of the tetraloop TAR RNA mutant-EtBr complex as a function of concentration of **DPA58** (E). The plot for EtBr displacement (%) of the tetraloop TAR RNA mutant-EtBr complex versus the log of the **DPA58**  $r_{dr}$ , the data shown with a sigmoidal fit, was used to determine the  $IC_{50}$  value (F). Buffer conditions: 100 mM KCl, 10 mM SC, 0.5 mM EDTA, pH 6.8. Tetraloop TAR RNA mutant = 200 nM/strand. [EtBr] = 5  $\mu$ M.

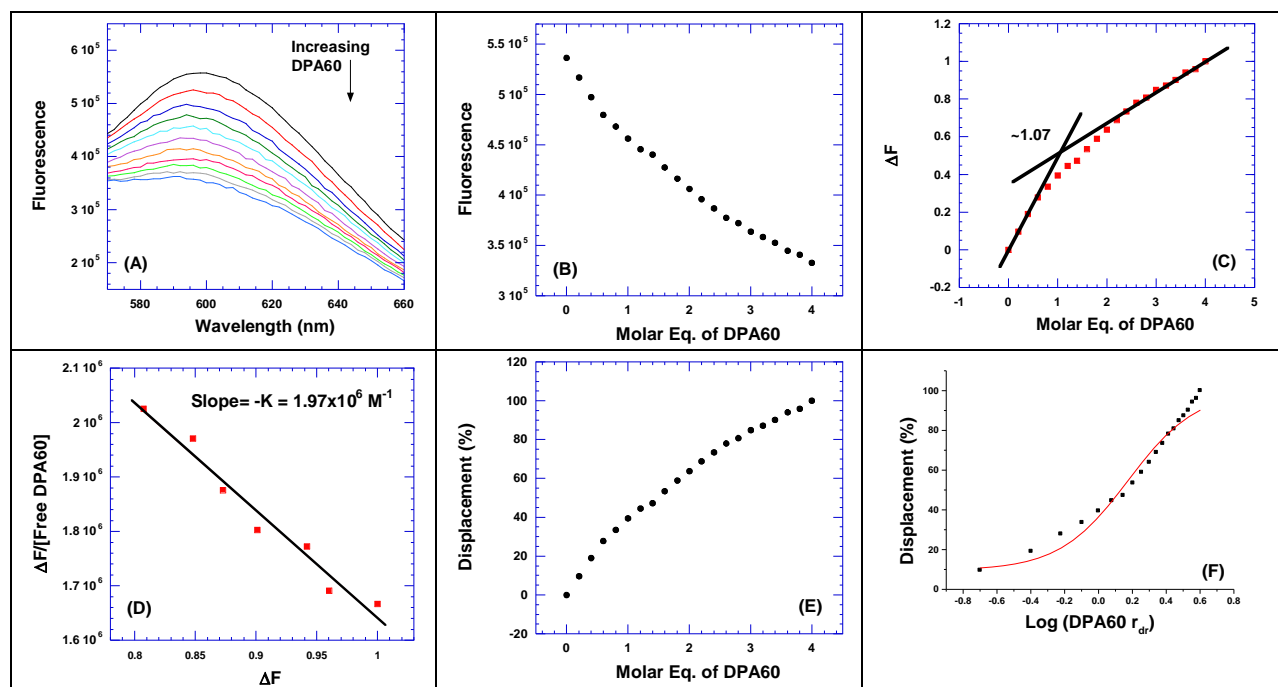

**Figure S4.18.** FID titration of **DPA60** with the **tetraloop TAR RNA mutant**. Raw fluorescence emission spectra in the presence of increasing concentration of **DPA60** (A). The decrease of fluorescence intensity (at 610 nm) of the tetraloop TAR RNA mutant/EtBr complex with increasing concentration of **DPA60** results in a saturating binding plot (B). The plot between normalized fluorescence intensity (at 610 nm) of the tetraloop TAR RNA mutant-EtBr complex as a function of concentration of **DPA60** results in a saturating binding plot (C). The Scatchard plot analysis of **DPA60** with the tetraloop TAR RNA mutant (D). The plot between normalized EtBr displacement (at 610 nm) of the tetraloop TAR RNA mutant-EtBr complex as a function of concentration of **DPA60** (E). The plot for EtBr displacement (%) of the tetraloop TAR RNA mutant-EtBr complex versus the log of the **DPA60**  $r_{dr}$ , the data shown with a sigmoidal fit, was used to determine the  $IC_{50}$  value (F). Buffer conditions: 100 mM KCl, 10 mM SC, 0.5 mM EDTA, pH 6.8. Tetraloop TAR RNA mutant = 200 nM/strand. [EtBr] = 5  $\mu$ M.

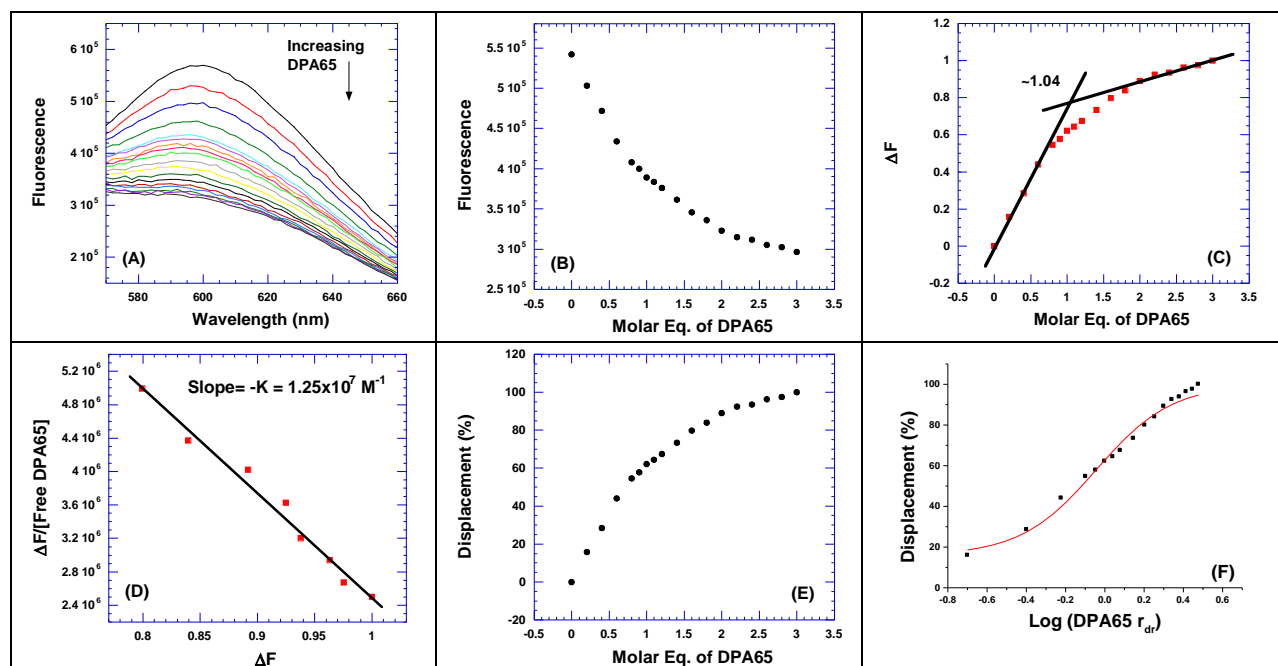

**Figure S4.19.** FID titration of **DPA65** with the **tetraloop TAR RNA mutant**. Raw fluorescence emission spectra in the presence of increasing concentration of **DPA65** (A). The decrease of fluorescence intensity (at 610 nm) of the tetraloop TAR RNA mutant/EtBr complex with increasing concentration of **DPA65** results in a saturating binding plot (B). The plot between normalized fluorescence intensity (at 610 nm) of the tetraloop TAR RNA mutant-EtBr complex as a function of concentration of **DPA65** results in a saturating binding plot (C). The Scatchard plot analysis of **DPA65** with the tetraloop TAR RNA mutant (D). The plot between normalized EtBr displacement (at 610 nm) of the tetraloop TAR RNA mutant-EtBr complex as a function of concentration of **DPA65** (E). The plot for EtBr displacement (%) of the tetraloop TAR RNA mutant-EtBr complex versus the log of the **DPA65**  $r_{dr}$ , the data shown with a sigmoidal fit, was used to determine the  $IC_{50}$  value (F). Buffer conditions: 100 mM KCl, 10 mM SC, 0.5 mM EDTA, pH 6.8. Tetraloop TAR RNA mutant = 200 nM/strand. [EtBr] = 5  $\mu$ M.

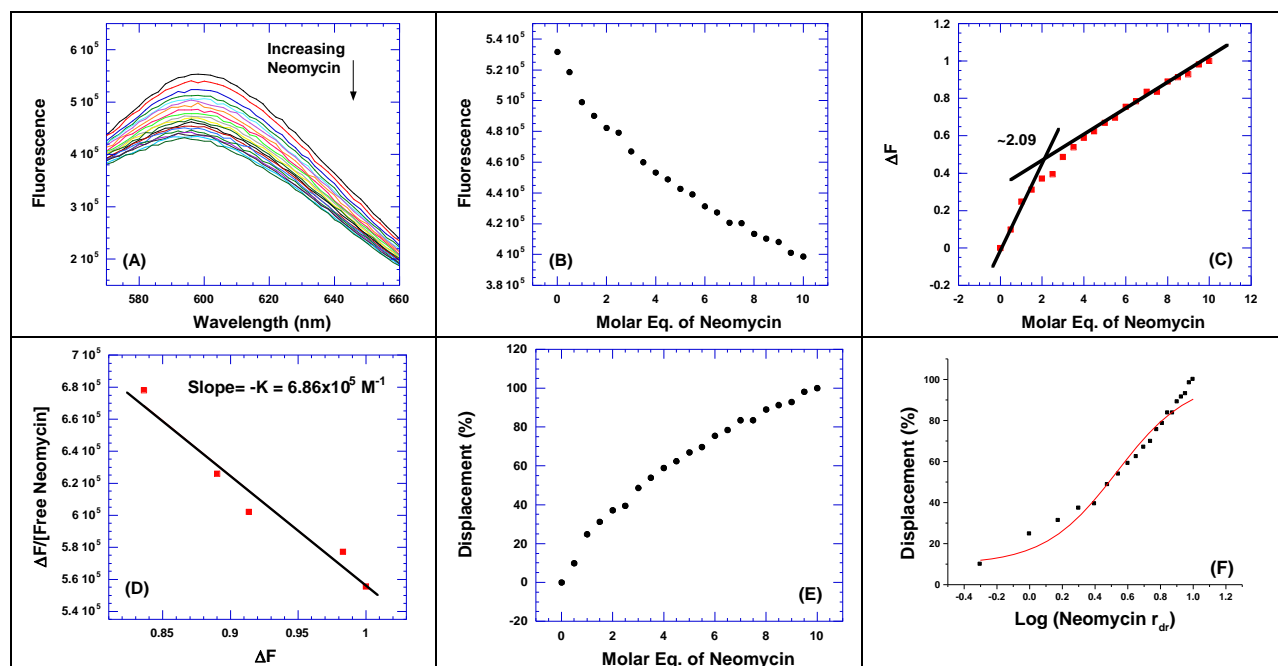

**Figure S4.20.** FID titration of **neomycin** with the **tetraloop TAR RNA mutant**. Raw fluorescence emission spectra in the presence of increasing concentration of **neomycin** (A). The decrease of fluorescence intensity (at 610 nm) of the tetraloop TAR RNA mutant/EtBr complex with increasing concentration of **neomycin** results in a saturating binding plot (B). The plot between normalized fluorescence intensity (at 610 nm) of the tetraloop TAR RNA mutant-EtBr complex as a function of concentration of **neomycin** results in a saturating binding plot (C). The Scatchard plot analysis of **neomycin** with the tetraloop TAR RNA mutant (D). The plot between normalized EtBr displacement (at 610 nm) of the tetraloop TAR RNA mutant-EtBr complex as a function of concentration of **neomycin** (E). The plot for EtBr displacement (%) of the tetraloop TAR RNA mutant-EtBr complex versus the log of the **neomycin**  $r_{dr}$ , the data shown with a sigmoidal fit, was used to determine the  $IC_{50}$  value (F). Buffer conditions: 100 mM KCl, 10 mM SC, 0.5 mM EDTA, pH 6.8. Tetraloop TAR RNA mutant = 200 nM/strand. [EtBr] = 5  $\mu$ M.

## Bulgeless Tetraloop TAR RNA Mutant Ethidium Bromide Displacement Binding Assay

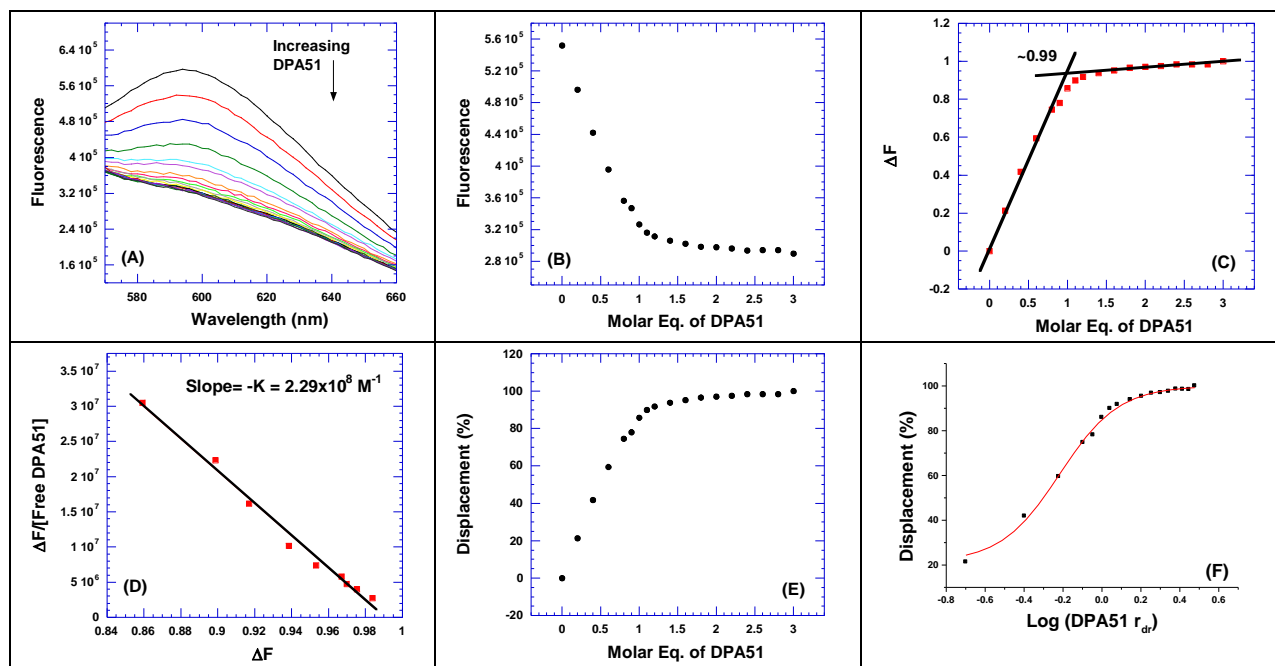

**Figure S4.21.** FID titration of **DPA51** with the **bulgeless tetraloop TAR RNA mutant**. Raw fluorescence emission spectra in the presence of increasing concentration of **DPA51** (A). The decrease of fluorescence intensity (at 610 nm) of the bulgeless tetraloop TAR RNA mutant/EtBr complex with increasing concentration of **DPA51** results in a saturating binding plot (B). The plot between normalized fluorescence intensity (at 610 nm) of the bulgeless tetraloop TAR RNA mutant-EtBr complex as a function of concentration of **DPA51** results in a saturating binding plot (C). The Scatchard plot analysis of **DPA51** with the bulgeless tetraloop TAR RNA mutant (D). The plot between normalized EtBr displacement (at 610 nm) of the bulgeless tetraloop TAR RNA mutant-EtBr complex as a function of concentration of **DPA51** (E). The plot for EtBr displacement (%) of the bulgeless tetraloop TAR RNA mutant-EtBr complex versus the log of the **DPA51**  $r_{dr}$ , the data shown with a sigmoidal fit, was used to determine the  $IC_{50}$  value (F). Buffer conditions: 100 mM KCl, 10 mM SC, 0.5 mM EDTA, pH 6.8. Bulgeless tetraloop TAR RNA mutant = 200 nM/strand. [EtBr] = 5  $\mu$ M.

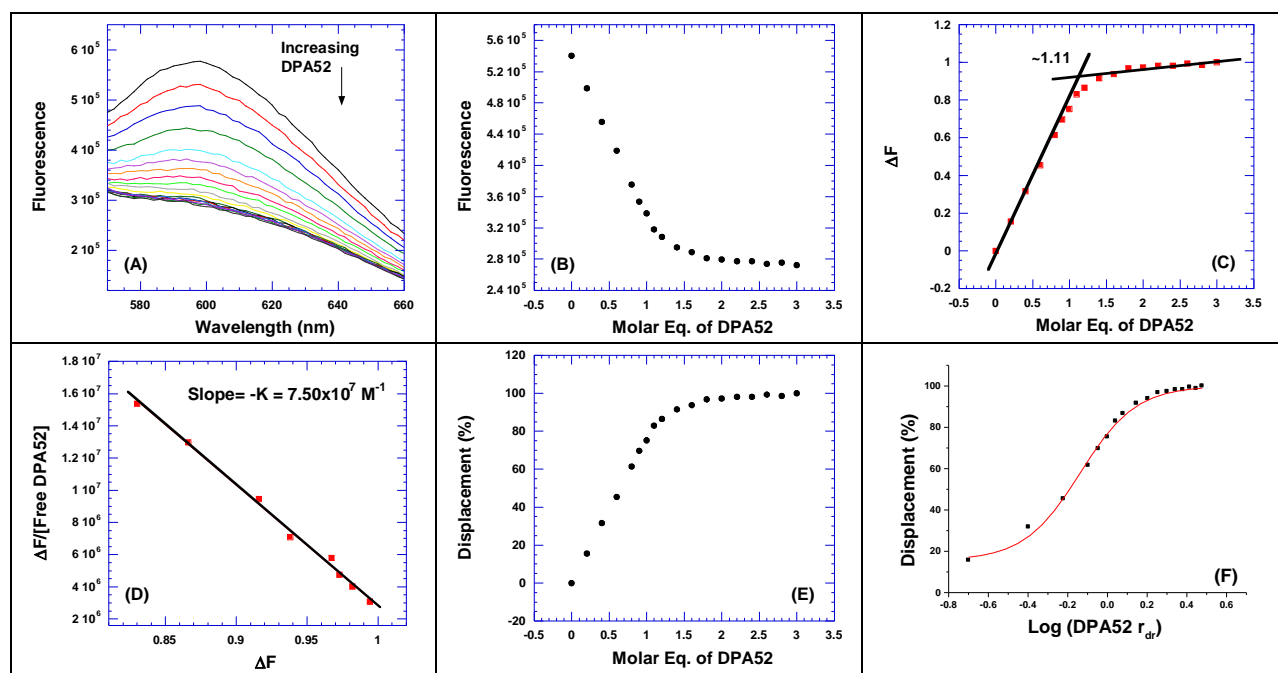

**Figure S4.22.** FID titration of **DPA52** with the **bulgeless tetraloop TAR RNA mutant**. Raw fluorescence emission spectra in the presence of increasing concentration of **DPA52** (A). The decrease of fluorescence intensity (at 610 nm) of the bulgeless tetraloop TAR RNA mutant/EtBr complex with increasing concentration of **DPA52** results in a saturating binding plot (B). The plot between normalized fluorescence intensity (at 610 nm) of the bulgeless tetraloop TAR RNA mutant-EtBr complex as a function of concentration of **DPA52** results in a saturating binding plot (C). The Scatchard plot analysis of **DPA52** with the bulgeless tetraloop TAR RNA mutant (D). The plot between normalized EtBr displacement (at 610 nm) of the bulgeless tetraloop TAR RNA mutant-EtBr complex as a function of concentration of **DPA52** (E). The plot for EtBr displacement (%) of the bulgeless tetraloop TAR RNA mutant-EtBr complex versus the log of the **DPA52**  $r_{dr}$ , the data shown with a sigmoidal fit, was used to determine the  $IC_{50}$  value (F). Buffer conditions: 100 mM KCl, 10 mM SC, 0.5 mM EDTA, pH 6.8. Bulgeless tetraloop TAR RNA mutant = 200 nM/strand. [EtBr] = 5  $\mu$ M.



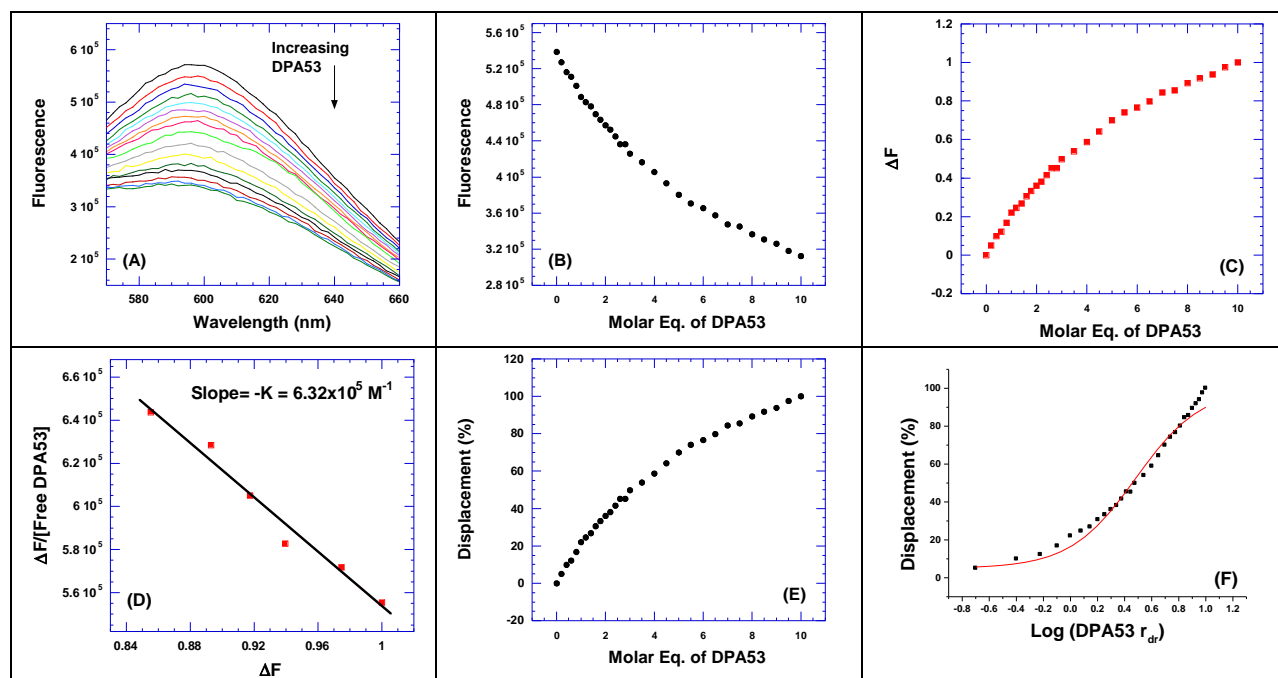

**Figure S4.23.** FID titration of **DPA53** with the **bulgeless tetraloop TAR RNA mutant**. Raw fluorescence emission spectra in the presence of increasing concentration of **DPA53** (A). The decrease of fluorescence intensity (at 610 nm) of the bulgeless tetraloop TAR RNA mutant/EtBr complex with increasing concentration of **DPA53** results in a saturating binding plot (B). The plot between normalized fluorescence intensity (at 610 nm) of the bulgeless tetraloop TAR RNA mutant-EtBr complex as a function of concentration of **DPA53** results in a saturating binding plot (C). The Scatchard plot analysis of **DPA53** with the bulgeless tetraloop TAR RNA mutant (D). The plot between normalized EtBr displacement (at 610 nm) of the bulgeless tetraloop TAR RNA mutant-EtBr complex as a function of concentration of **DPA53** (E). The plot for EtBr displacement (%) of the bulgeless tetraloop TAR RNA mutant-EtBr complex versus the log of the **DPA53**  $r_{dr}$ , the data shown with a sigmoidal fit, was used to determine the  $IC_{50}$  value (F). Buffer conditions: 100 mM KCl, 10 mM SC, 0.5 mM EDTA, pH 6.8. Bulgeless tetraloop TAR RNA mutant = 200 nM/strand. [EtBr] = 5  $\mu$ M.

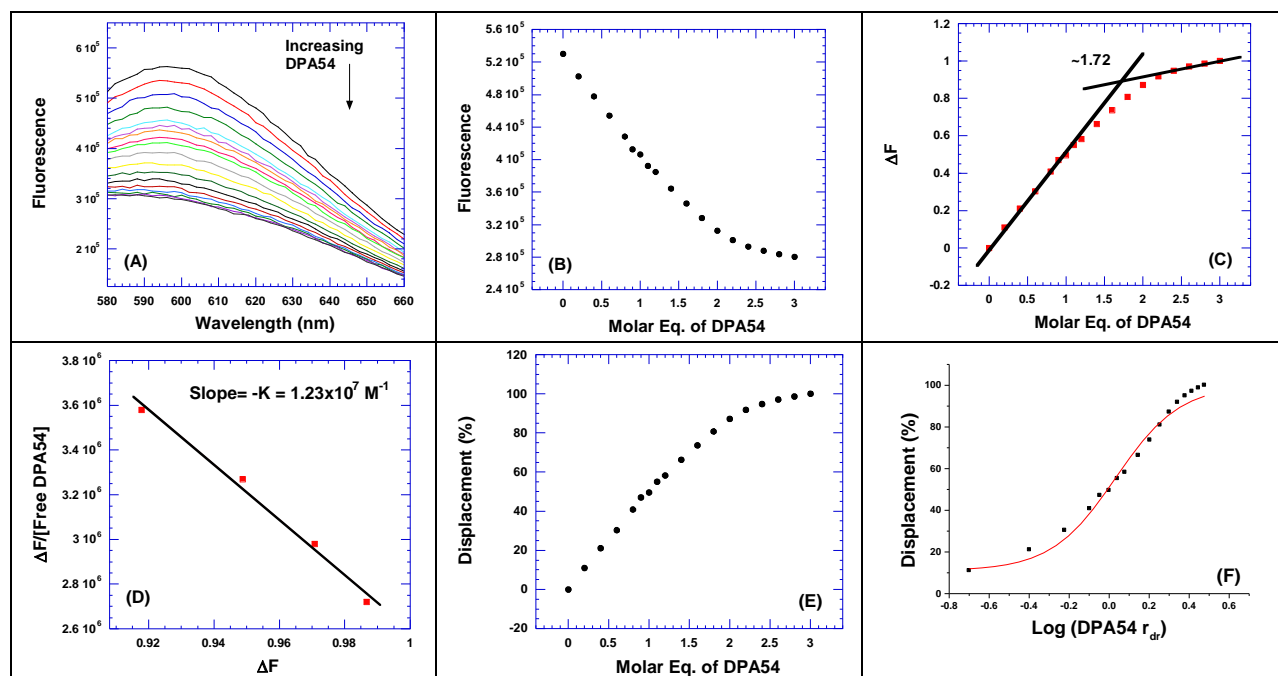

**Figure S4.24.** FID titration of **DPA54** with the **bulgeless tetraloop TAR RNA mutant**. Raw fluorescence emission spectra in the presence of increasing concentration of **DPA54** (A). The decrease of fluorescence intensity (at 610 nm) of the bulgeless tetraloop TAR RNA mutant/EtBr complex with increasing concentration of **DPA54** results in a saturating binding plot (B). The plot between normalized fluorescence intensity (at 610 nm) of the bulgeless tetraloop TAR RNA mutant-EtBr complex as a function of concentration of **DPA54** results in a saturating binding plot (C). The Scatchard plot analysis of **DPA54** with the bulgeless tetraloop TAR RNA mutant (D). The plot between normalized EtBr displacement (at 610 nm) of the bulgeless tetraloop TAR RNA mutant-EtBr complex as a function of concentration of **DPA54** (E). The plot for EtBr displacement (%) of the bulgeless tetraloop TAR RNA mutant-EtBr complex versus the log of the **DPA54**  $r_{dr}$ , the data shown with a sigmoidal fit, was used to determine the  $IC_{50}$  value (F). Buffer conditions: 100 mM KCl, 10 mM SC, 0.5 mM EDTA, pH 6.8. Bulgeless tetraloop TAR RNA mutant = 200 nM/strand. [EtBr] = 5  $\mu$ M.

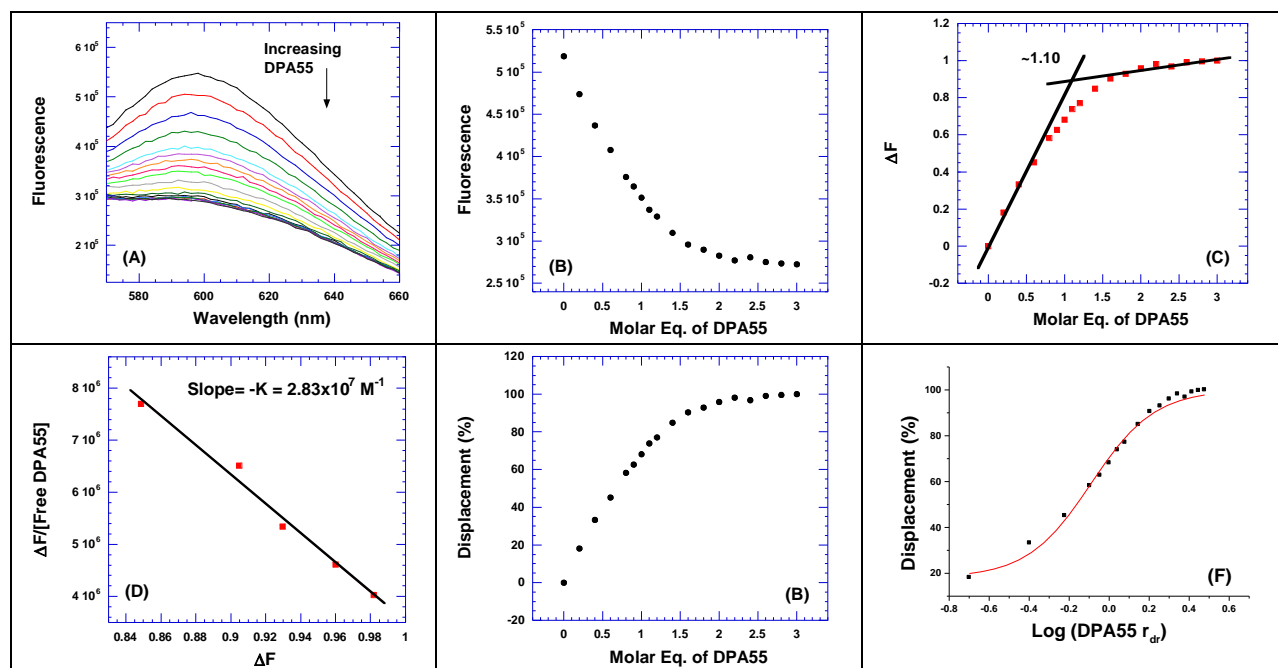

**Figure S4.25.** FID titration of **DPA55** with the **bulgeless tetraloop TAR RNA mutant**. Raw fluorescence emission spectra in the presence of increasing concentration of **DPA55** (A). The decrease of fluorescence intensity (at 610 nm) of the bulgeless tetraloop TAR RNA mutant/EtBr complex with increasing concentration of **DPA55** results in a saturating binding plot (B). The plot between normalized fluorescence intensity (at 610 nm) of the bulgeless tetraloop TAR RNA mutant-EtBr complex as a function of concentration of **DPA55** results in a saturating binding plot (C). The Scatchard plot analysis of **DPA55** with the bulgeless tetraloop TAR RNA mutant (D). The plot between normalized EtBr displacement (at 610 nm) of the bulgeless tetraloop TAR RNA mutant-EtBr complex as a function of concentration of **DPA55** (E). The plot for EtBr displacement (%) of the bulgeless tetraloop TAR RNA mutant-EtBr complex versus the log of the **DPA55**  $r_{dr}$ , the data shown with a sigmoidal fit, was used to determine the  $IC_{50}$  value (F). Buffer conditions: 100 mM KCl, 10 mM SC, 0.5 mM EDTA, pH 6.8. Bulgeless tetraloop TAR RNA mutant = 200 nM/strand. [EtBr] = 5  $\mu$ M.

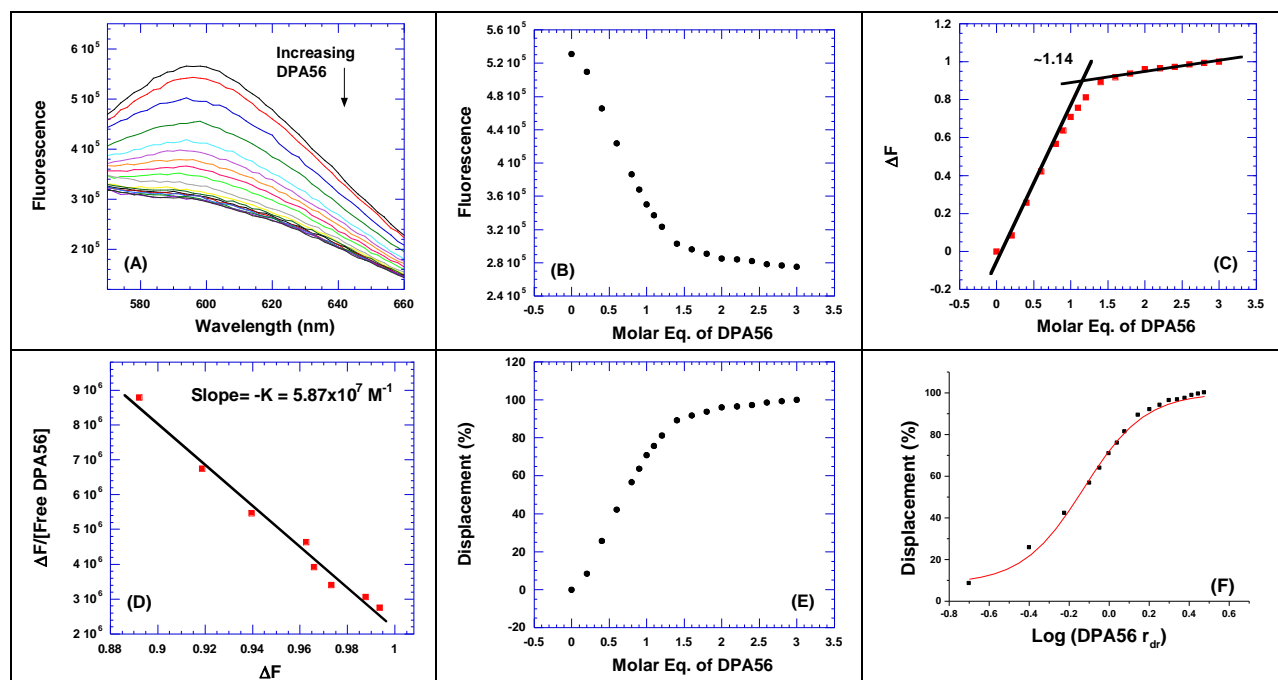

**Figure S4.26.** FID titration of **DPA56** with the **bulgeless tetraloop TAR RNA mutant**. Raw fluorescence emission spectra in the presence of increasing concentration of **DPA56** (A). The decrease of fluorescence intensity (at 610 nm) of the bulgeless tetraloop TAR RNA mutant-EtBr complex with increasing concentration of **DPA56** results in a saturating binding plot (B). The plot between normalized fluorescence intensity (at 610 nm) of the bulgeless tetraloop TAR RNA mutant-EtBr complex as a function of concentration of **DPA56** results in a saturating binding plot (C). The Scatchard plot analysis of **DPA56** with the bulgeless tetraloop TAR RNA mutant (D). The plot between normalized EtBr displacement (at 610 nm) of the bulgeless tetraloop TAR RNA mutant-EtBr complex as a function of concentration of **DPA56** (E). The plot for EtBr displacement (%) of the bulgeless tetraloop TAR RNA mutant-EtBr complex versus the log of the **DPA56**  $r_{dr}$ , the data shown with a sigmoidal fit, was used to determine the  $IC_{50}$  value (F). Buffer conditions: 100 mM KCl, 10 mM SC, 0.5 mM EDTA, pH 6.8. Bulgeless tetraloop TAR RNA mutant = 200 nM/strand. [EtBr] = 5  $\mu$ M.

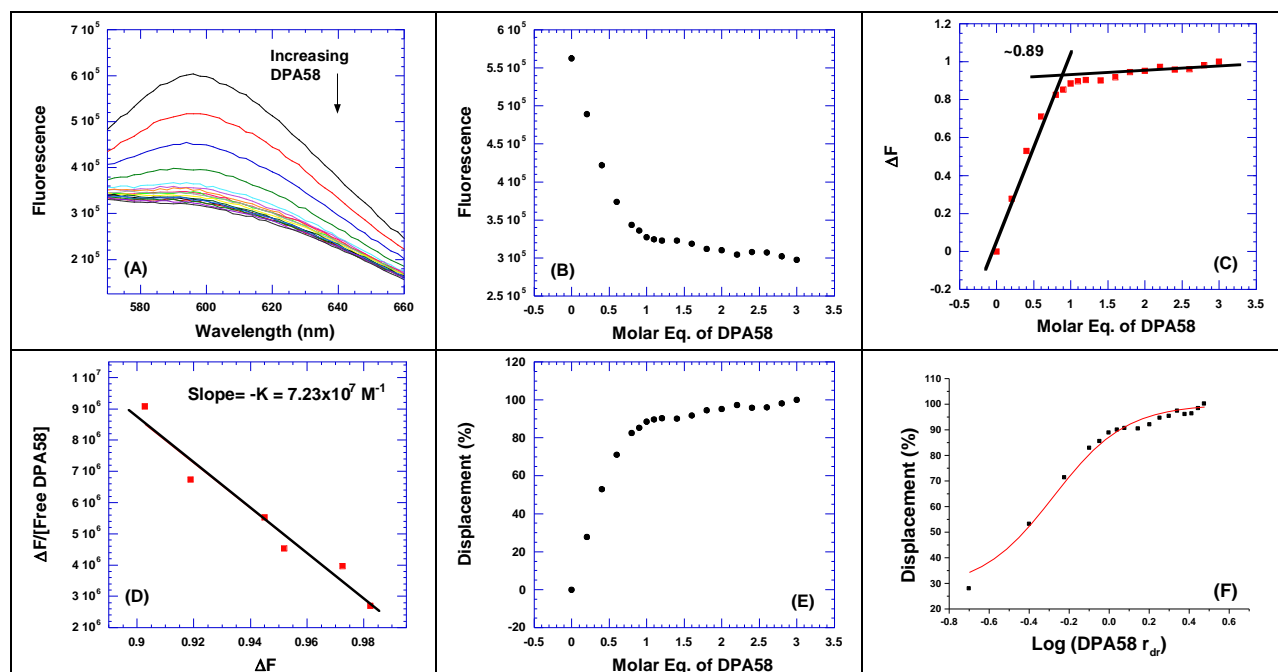

**Figure S4.27.** FID titration of **DPA58** with the **bulgeless tetraloop TAR RNA mutant**. Raw fluorescence emission spectra in the presence of increasing concentration of **DPA58** (A). The decrease of fluorescence intensity (at 610 nm) of the bulgeless tetraloop TAR RNA mutant/EtBr complex with increasing concentration of **DPA58** results in a saturating binding plot (B). The plot between normalized fluorescence intensity (at 610 nm) of the bulgeless tetraloop TAR RNA mutant-EtBr complex as a function of concentration of **DPA58** results in a saturating binding plot (C). The Scatchard plot analysis of **DPA58** with the bulgeless tetraloop TAR RNA mutant (D). The plot between normalized EtBr displacement (at 610 nm) of the bulgeless tetraloop TAR RNA mutant-EtBr complex as a function of concentration of **DPA58** (E). The plot for EtBr displacement (%) of the bulgeless tetraloop TAR RNA mutant-EtBr complex versus the log of the **DPA58**  $r_{dr}$ , the data shown with a sigmoidal fit, was used to determine the  $IC_{50}$  value (F). Buffer conditions: 100 mM KCl, 10 mM SC, 0.5 mM EDTA, pH 6.8. Bulgeless tetraloop TAR RNA mutant = 200 nM/strand. [EtBr] = 5  $\mu$ M.

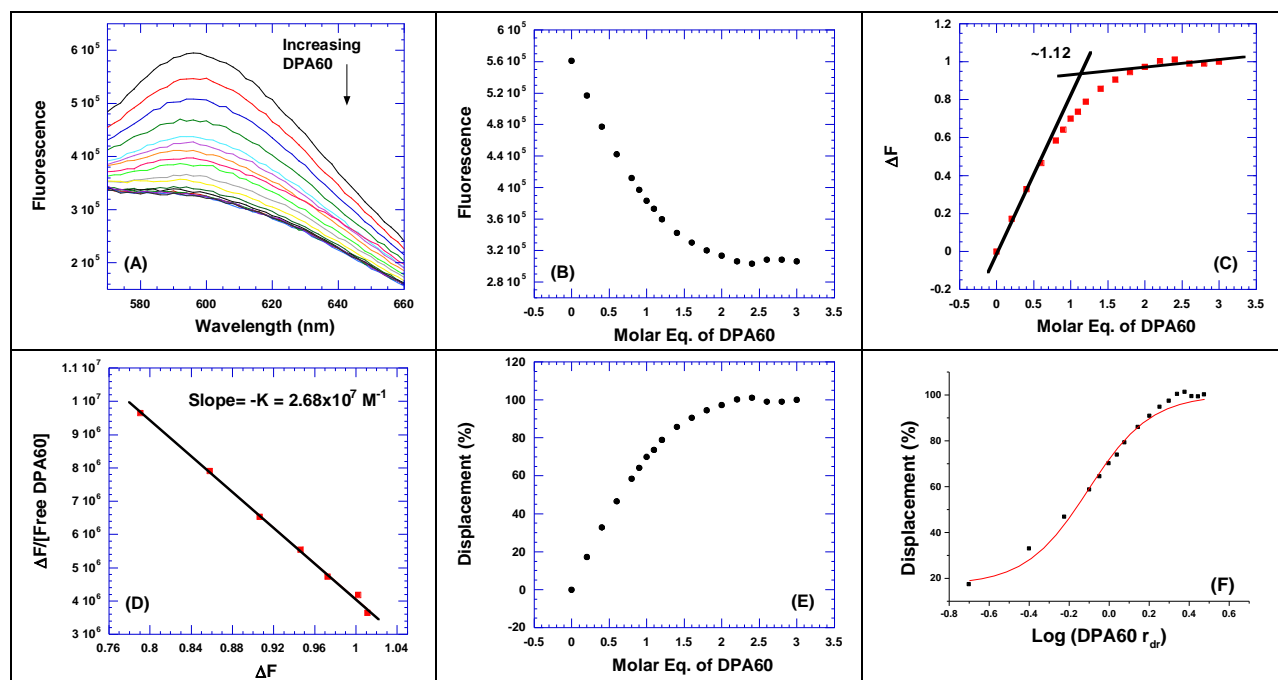

**Figure S4.28.** FID titration of **DPA60** with the **bulgeless tetraloop TAR RNA mutant**. Raw fluorescence emission spectra in the presence of increasing concentration of **DPA60** (A). The decrease of fluorescence intensity (at 610 nm) of the bulgeless tetraloop TAR RNA mutant/EtBr complex with increasing concentration of **DPA60** results in a saturating binding plot (B). The plot between normalized fluorescence intensity (at 610 nm) of the bulgeless tetraloop TAR RNA mutant-EtBr complex as a function of concentration of **DPA60** results in a saturating binding plot (C). The Scatchard plot analysis of **DPA60** with the bulgeless tetraloop TAR RNA mutant (D). The plot between normalized EtBr displacement (at 610 nm) of the bulgeless tetraloop TAR RNA mutant-EtBr complex as a function of concentration of **DPA60** (E). The plot for EtBr displacement (%) of the bulgeless tetraloop TAR RNA mutant-EtBr complex versus the log of the **DPA60**  $r_{dr}$ , the data shown with a sigmoidal fit, was used to determine the  $IC_{50}$  value (F). Buffer conditions: 100 mM KCl, 10 mM SC, 0.5 mM EDTA, pH 6.8. Bulgeless tetraloop TAR RNA mutant = 200 nM/strand. [EtBr] = 5  $\mu$ M.

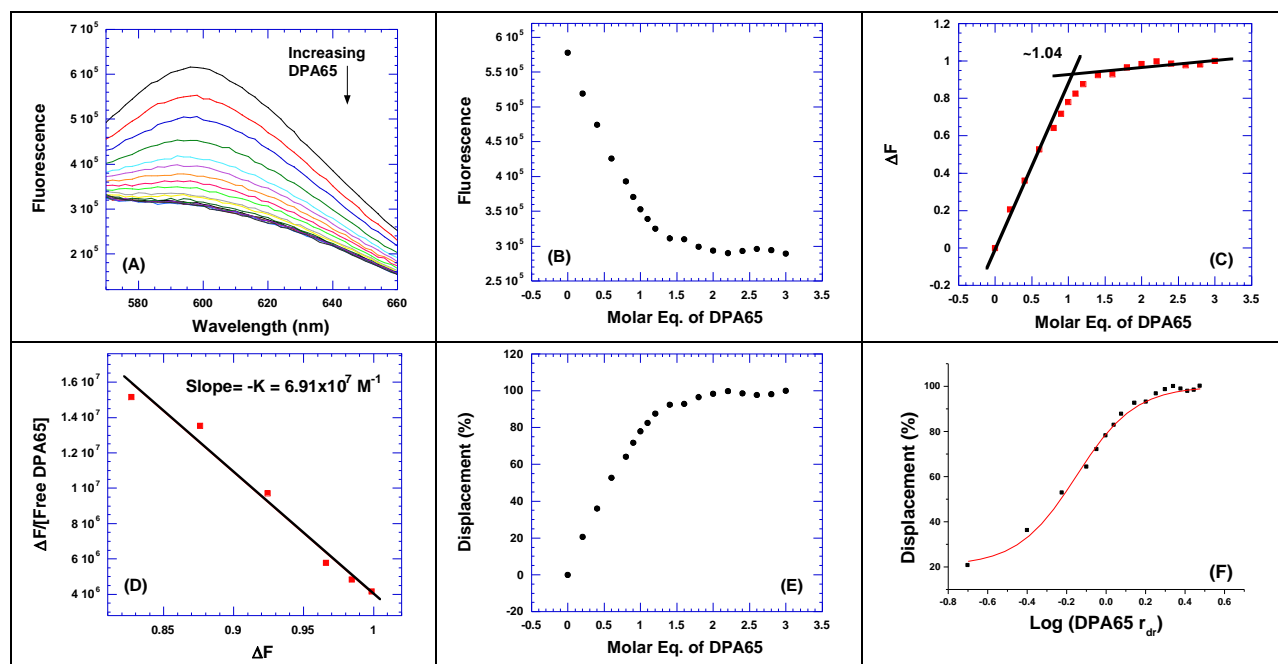

**Figure S4.29.** FID titration of **DPA65** with the **bulgeless tetraloop TAR RNA mutant**. Raw fluorescence emission spectra in the presence of increasing concentration of **DPA65** (A). The decrease of fluorescence intensity (at 610 nm) of the bulgeless tetraloop TAR RNA mutant/EtBr complex with increasing concentration of **DPA65** results in a saturating binding plot (B). The plot between normalized fluorescence intensity (at 610 nm) of the bulgeless tetraloop TAR RNA mutant-EtBr complex as a function of concentration of **DPA65** results in a saturating binding plot (C). The Scatchard plot analysis of **DPA65** with the bulgeless tetraloop TAR RNA mutant (D). The plot between normalized EtBr displacement (at 610 nm) of the bulgeless tetraloop TAR RNA mutant-EtBr complex as a function of concentration of **DPA65** (E). The plot for EtBr displacement (%) of the bulgeless tetraloop TAR RNA mutant-EtBr complex versus the log of the **DPA65**  $r_{dr}$ , the data shown with a sigmoidal fit, was used to determine the  $IC_{50}$  value (F). Buffer conditions: 100 mM KCl, 10 mM SC, 0.5 mM EDTA, pH 6.8. Bulgeless tetraloop TAR RNA mutant = 200 nM/strand. [EtBr] = 5  $\mu$ M.

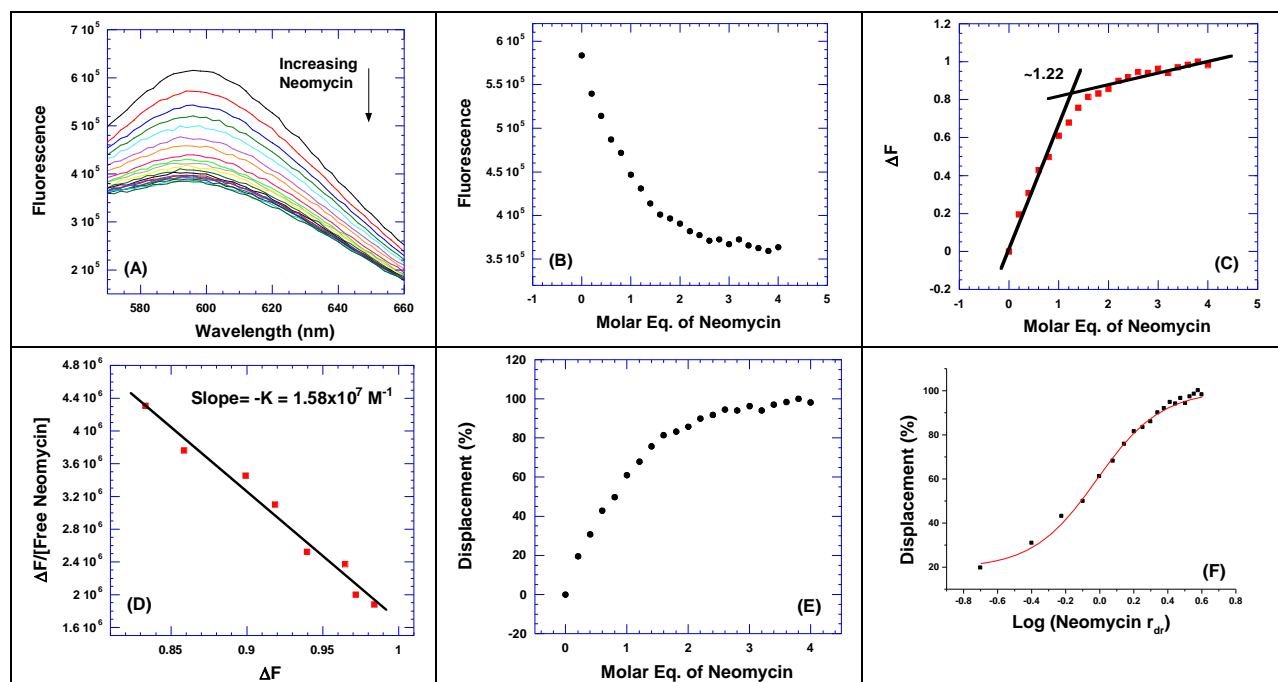

**Figure S4.30.** FID titration of **neomycin** with the **bulgeless tetraloop TAR RNA mutant**. Raw fluorescence emission spectra in the presence of increasing concentration of **neomycin** (A). The decrease of fluorescence intensity (at 610 nm) of the bulgeless tetraloop TAR RNA mutant/EtBr complex with increasing concentration of **neomycin** results in a saturating binding plot (B). The plot between normalized fluorescence intensity (at 610 nm) of the bulgeless tetraloop TAR RNA mutant-EtBr complex as a function of concentration of **neomycin** results in a saturating binding plot (C). The Scatchard plot analysis of **neomycin** with the bulgeless tetraloop TAR RNA mutant (D). The plot between normalized EtBr displacement (at 610 nm) of the bulgeless tetraloop TAR RNA mutant-EtBr complex as a function of concentration of **neomycin** (E). The plot for EtBr displacement (%) of the bulgeless tetraloop TAR RNA mutant-EtBr complex versus the log of the **neomycin**  $r_{dr}$ , the data shown with a sigmoidal fit, was used to determine the  $IC_{50}$  value (F). Buffer conditions: 100 mM KCl, 10 mM SC, 0.5 mM EDTA, pH 6.8. Bulgeless tetraloop TAR RNA mutant = 200 nM/strand. [EtBr] = 5  $\mu$ M.



### U3 Bulge TAR RNA Mutant Ethidium Bromide Displacement Binding Assay

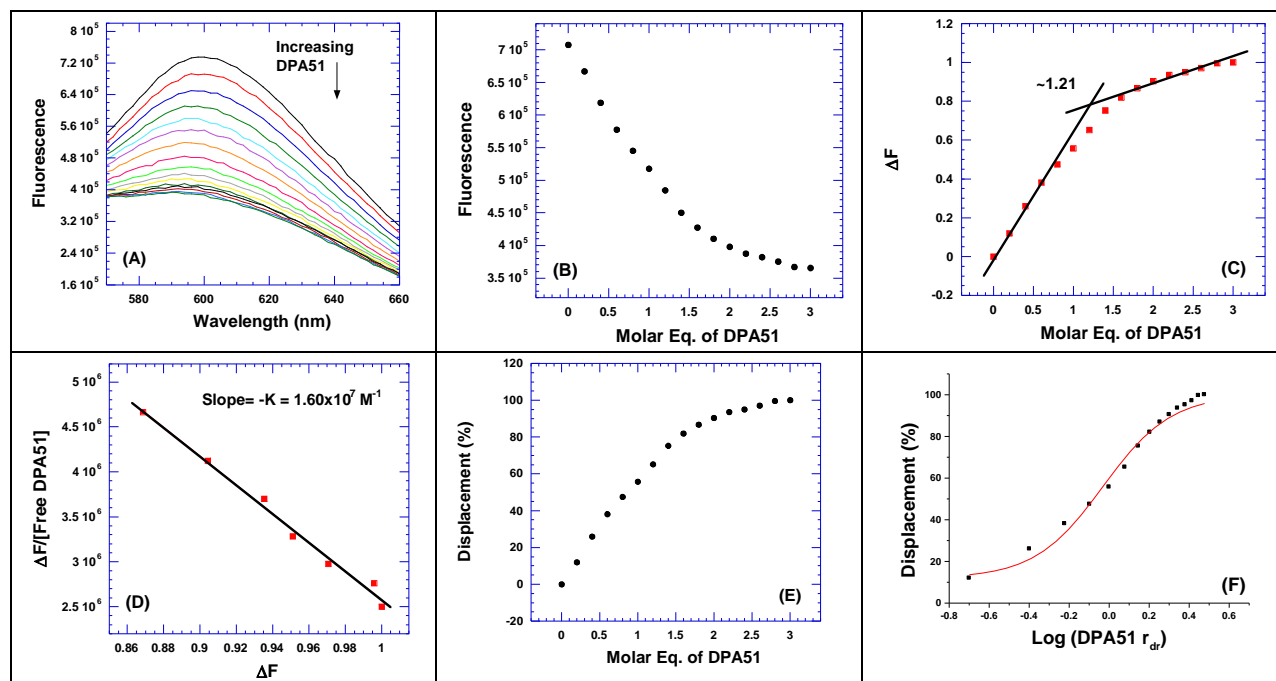

**Figure S4.31.** FID titration of **DPA51** with the **U3 bulge TAR RNA mutant**. Raw fluorescence emission spectra in the presence of increasing concentration of **DPA51** (A). The decrease of fluorescence intensity (at 610 nm) of the U3 bulge TAR RNA mutant/EtBr complex with increasing concentration of **DPA51** results in a saturating binding plot (B). The plot between normalized fluorescence intensity (at 610 nm) of the U3 bulge TAR RNA mutant-EtBr complex as a function of concentration of **DPA51** results in a saturating binding plot (C). The Scatchard plot analysis of **DPA51** with the U3 bulge TAR RNA mutant (D). The plot between normalized EtBr displacement (at 610 nm) of the U3 bulge TAR RNA mutant-EtBr complex as a function of concentration of **DPA51** (E). The plot for EtBr displacement (%) of the U3 bulge TAR RNA mutant-EtBr complex versus the log of the **DPA51**  $r_{dr}$ , the data shown with a sigmoidal fit, was used to determine the  $IC_{50}$  value (F). Buffer conditions: 100 mM KCl, 10 mM SC, 0.5 mM EDTA, pH 6.8. U3 bulge TAR RNA mutant = 200 nM/strand. [EtBr] = 5  $\mu\text{M}$ .

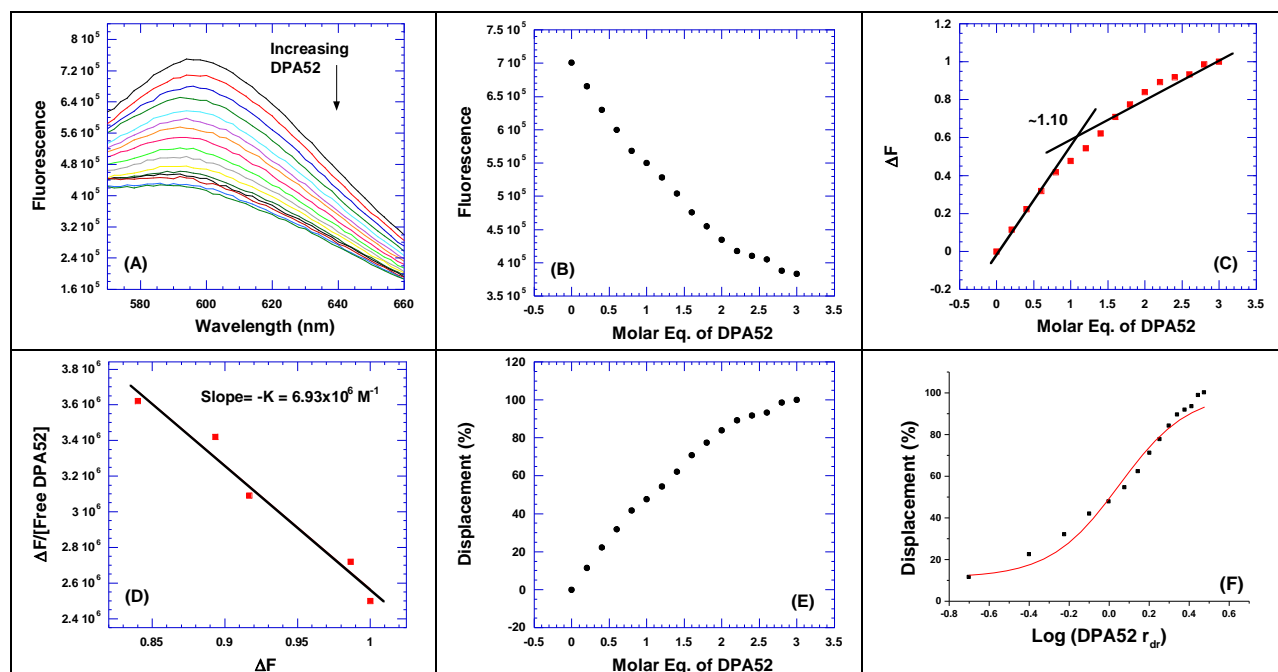

**Figure S4.32.** FID titration of **DPA52** with the **U3 bulge TAR RNA mutant**. Raw fluorescence emission spectra in the presence of increasing concentration of **DPA52** (A). The decrease of fluorescence intensity (at 610 nm) of the U3 bulge TAR RNA mutant/EtBr complex with increasing concentration of **DPA52** results in a saturating binding plot (B). The plot between normalized fluorescence intensity (at 610 nm) of the U3 bulge TAR RNA mutant-EtBr complex as a function of concentration of **DPA52** results in a saturating binding plot (C). The Scatchard plot analysis of **DPA52** with the U3 bulge TAR RNA mutant (D). The plot between normalized EtBr displacement (at 610 nm) of the U3 bulge TAR RNA mutant-EtBr complex as a function of concentration of **DPA52** (E). The plot for EtBr displacement (%) of the U3 bulge TAR RNA mutant-EtBr complex versus the log of the **DPA52**  $r_{dr}$ , the data shown with a sigmoidal fit, was used to determine the  $IC_{50}$  value (F). Buffer conditions: 100 mM KCl, 10 mM SC, 0.5 mM EDTA, pH 6.8. U3 bulge TAR RNA mutant = 200 nM/strand. [EtBr] = 5  $\mu$ M.

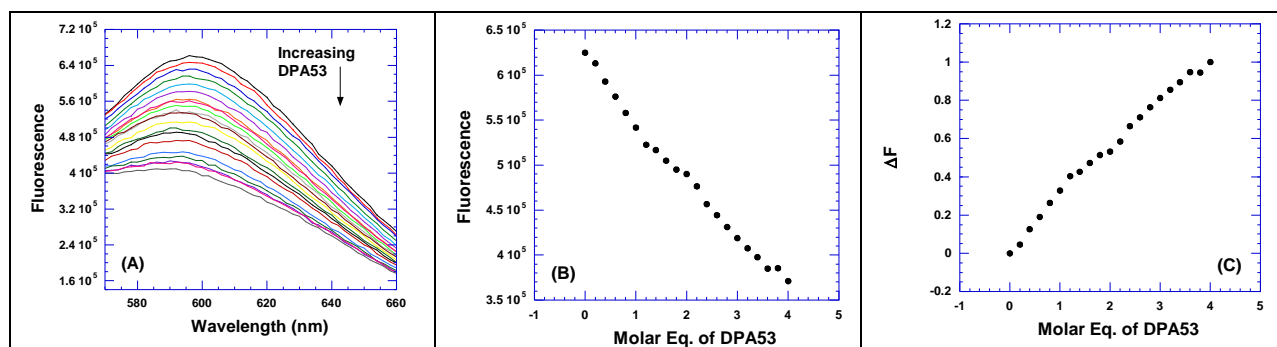

**Figure S4.33.** FID titration of **DPA53** with the **U3 bulge TAR RNA mutant**. Raw fluorescence emission spectra in the presence of increasing concentration of **DPA53** (A). The decrease of fluorescence intensity (at 610 nm) of the U3 bulge TAR RNA mutant/EtBr complex with increasing concentration of **DPA53** (B). The plot between normalized fluorescence intensity (at 610 nm) of the U3 bulge TAR RNA mutant-EtBr complex as a function of concentration of **DPA53** (C). Buffer conditions: 100 mM KCl, 10 mM SC, 0.5 mM EDTA, pH 6.8. U3 bulge TAR RNA mutant = 200 nM/strand. [EtBr] = 5  $\mu$ M.

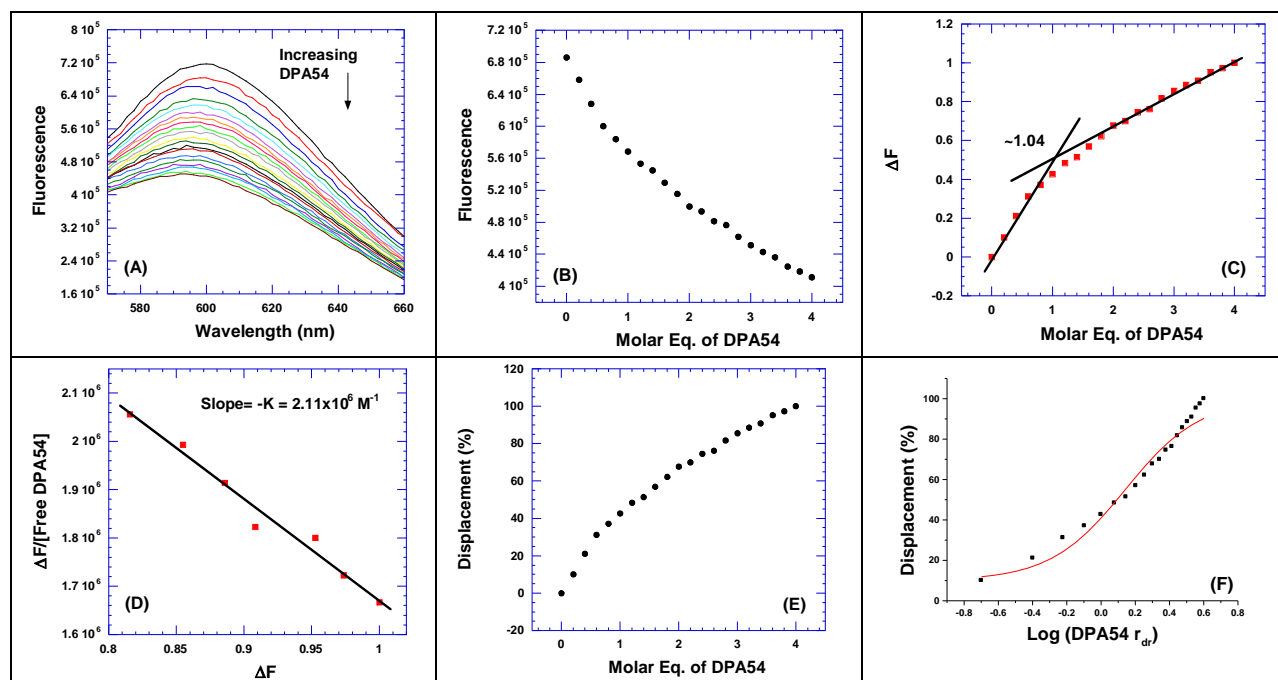

**Figure S4.34.** FID titration of **DPA54** with the **U3 bulge TAR RNA mutant**. Raw fluorescence emission spectra in the presence of increasing concentration of **DPA54** (A). The decrease of fluorescence intensity (at 610 nm) of the U3 bulge TAR RNA mutant-EtBr complex with increasing concentration of **DPA54** results in a saturating binding plot (B). The plot between normalized fluorescence intensity (at 610 nm) of the U3 bulge TAR RNA mutant-EtBr complex as a function of concentration of **DPA54** results in a saturating binding plot (C). The Scatchard plot analysis of **DPA54** with the U3 bulge TAR RNA mutant (D). The plot between normalized EtBr displacement (at 610 nm) of the U3 bulge TAR RNA mutant-EtBr complex as a function of concentration of **DPA54** (E). The plot for EtBr displacement (%) of the U3 bulge TAR RNA mutant-EtBr complex versus the log of the **DPA54**  $r_{dr}$ , the data shown with a sigmoidal fit, was used to determine the  $IC_{50}$  value (F). Buffer conditions: 100 mM KCl, 10 mM SC, 0.5 mM EDTA, pH 6.8. U3 bulge TAR RNA mutant = 200 nM/strand. [EtBr] = 5  $\mu$ M.

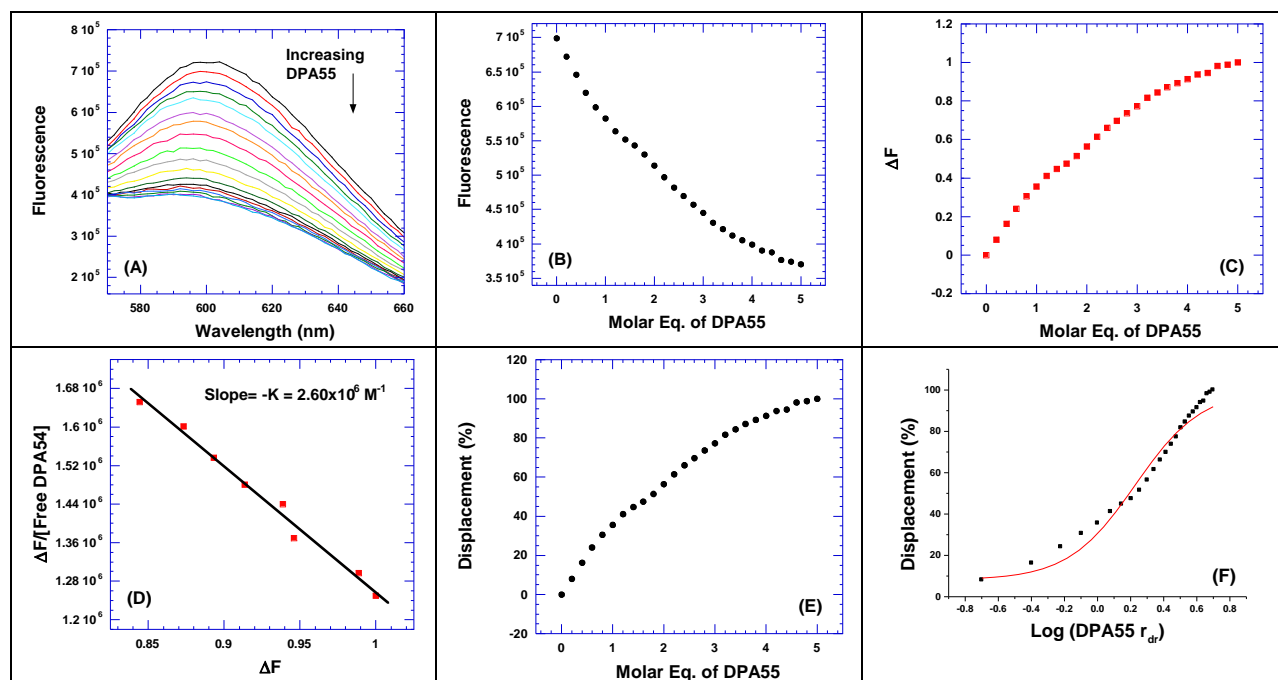

**Figure S4.35.** FID titration of **DPA55** with the **U3 bulge TAR RNA mutant**. Raw fluorescence emission spectra in the presence of increasing concentration of **DPA55** (A). The decrease of fluorescence intensity (at 610 nm) of the U3 bulge TAR RNA mutant/EtBr complex with increasing concentration of **DPA55** results in a saturating binding plot (B). The plot between normalized fluorescence intensity (at 610 nm) of the U3 bulge TAR RNA mutant-EtBr complex as a function of concentration of **DPA55** results in a saturating binding plot (C). The Scatchard plot analysis of **DPA55** with the U3 bulge TAR RNA mutant (D). The plot between normalized EtBr displacement (at 610 nm) of the U3 bulge TAR RNA mutant-EtBr complex as a function of concentration of **DPA55** (E). The plot for EtBr displacement (%) of the U3 bulge TAR RNA mutant-EtBr complex versus the log of the **DPA55**  $r_{dr}$ , the data shown with a sigmoidal fit, was used to determine the  $IC_{50}$  value (F). Buffer conditions: 100 mM KCl, 10 mM SC, 0.5 mM EDTA, pH 6.8. U3 bulge TAR RNA mutant = 200 nM/strand. [EtBr] = 5  $\mu$ M.

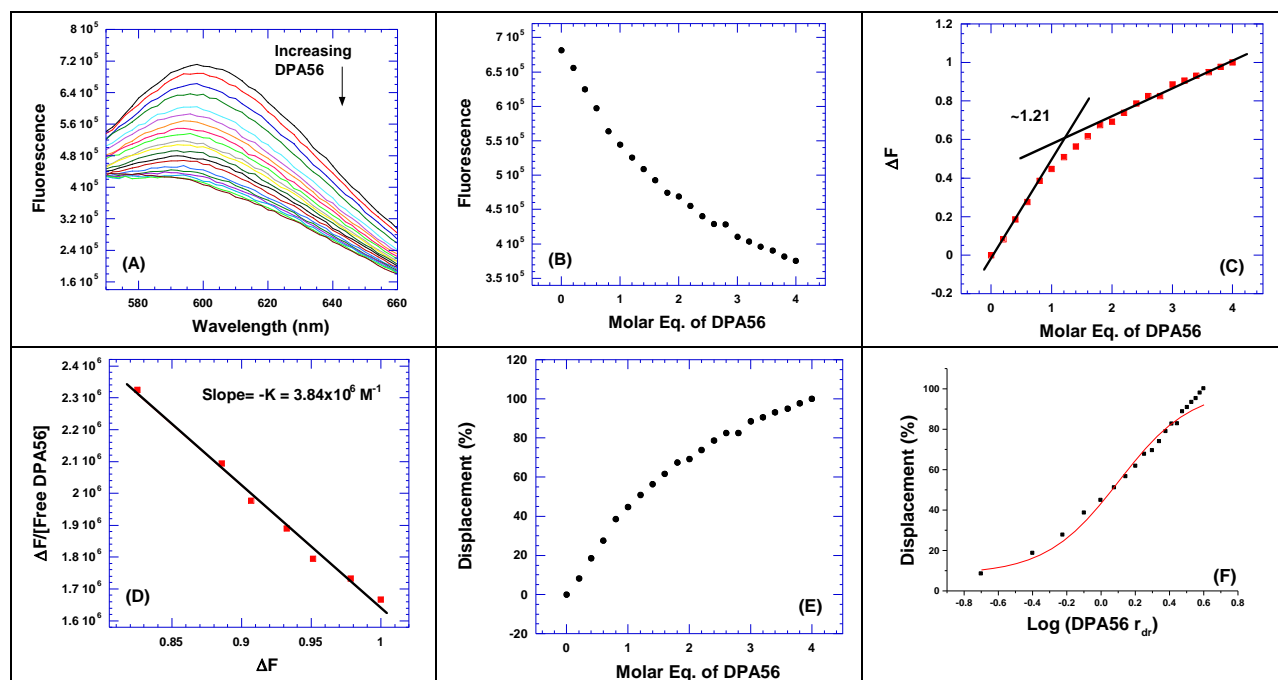

**Figure S4.36.** FID titration of **DPA56** with the **U3 bulge TAR RNA mutant**. Raw fluorescence emission spectra in the presence of increasing concentration of **DPA56** (A). The decrease of fluorescence intensity (at 610 nm) of the U3 bulge TAR RNA mutant/EtBr complex with increasing concentration of **DPA56** results in a saturating binding plot (B). The plot between normalized fluorescence intensity (at 610 nm) of the U3 bulge TAR RNA mutant-EtBr complex as a function of concentration of **DPA56** results in a saturating binding plot (C). The Scatchard plot analysis of **DPA56** with the U3 bulge TAR RNA mutant (D). The plot between normalized EtBr displacement (at 610 nm) of the U3 bulge TAR RNA mutant-EtBr complex as a function of concentration of **DPA56** (E). The plot for EtBr displacement (%) of the U3 bulge TAR RNA mutant-EtBr complex versus the log of the **DPA56**  $r_{dr}$ , the data shown with a sigmoidal fit, was used to determine the  $IC_{50}$  value (F). Buffer conditions: 100 mM KCl, 10 mM SC, 0.5 mM EDTA, pH 6.8. U3 bulge TAR RNA mutant = 200 nM/strand. [EtBr] = 5  $\mu$ M.

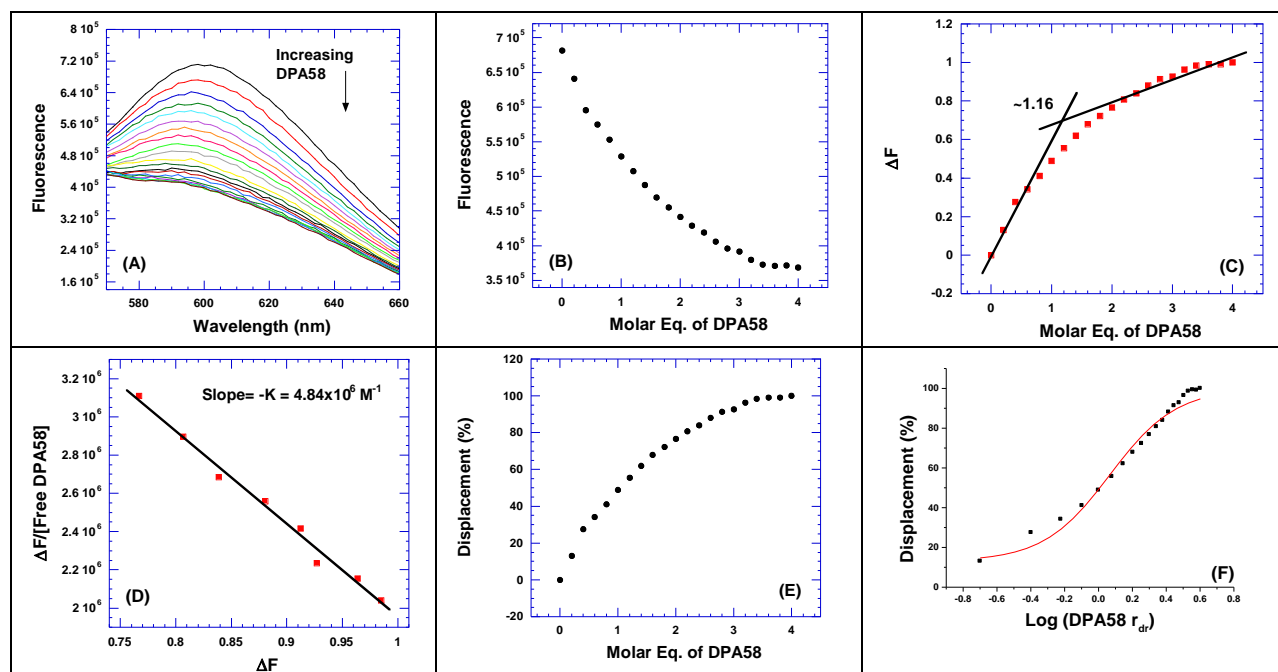

**Figure S4.37.** FID titration of **DPA58** with the **U3 bulge TAR RNA mutant**. Raw fluorescence emission spectra in the presence of increasing concentration of **DPA58** (A). The decrease of fluorescence intensity (at 610 nm) of the U3 bulge TAR RNA mutant/EtBr complex with increasing concentration of **DPA58** results in a saturating binding plot (B). The plot between normalized fluorescence intensity (at 610 nm) of the U3 bulge TAR RNA mutant-EtBr complex as a function of concentration of **DPA58** results in a saturating binding plot (C). The Scatchard plot analysis of **DPA58** with the U3 bulge TAR RNA mutant (D). The plot between normalized EtBr displacement (at 610 nm) of the U3 bulge TAR RNA mutant-EtBr complex as a function of concentration of **DPA58** (E). The plot for EtBr displacement (%) of the U3 bulge TAR RNA mutant-EtBr complex versus the log of the **DPA58**  $r_{dr}$ , the data shown with a sigmoidal fit, was used to determine the  $IC_{50}$  value (F). Buffer conditions: 100 mM KCl, 10 mM SC, 0.5 mM EDTA, pH 6.8. U3 bulge TAR RNA mutant = 200 nM/strand. [EtBr] = 5  $\mu$ M.

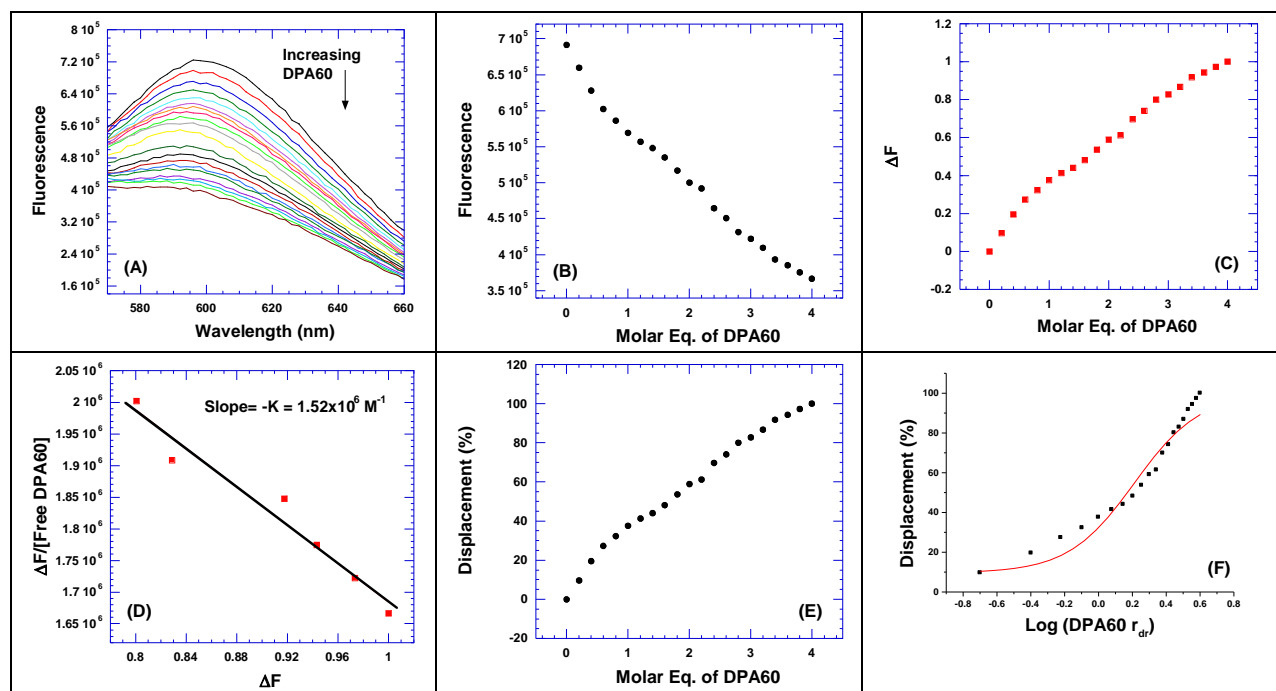

**Figure S4.38.** FID titration of **DPA60** with the **U3 bulge TAR RNA mutant**. Raw fluorescence emission spectra in the presence of increasing concentration of **DPA60** (A). The decrease of fluorescence intensity (at 610 nm) of the U3 bulge TAR RNA mutant/EtBr complex with increasing concentration of **DPA60** results in a saturating binding plot (B). The plot between normalized fluorescence intensity (at 610 nm) of the U3 bulge TAR RNA mutant-EtBr complex as a function of concentration of **DPA60** results in a saturating binding plot (C). The Scatchard plot analysis of **DPA60** with the U3 bulge TAR RNA mutant (D). The plot between normalized EtBr displacement (at 610 nm) of the U3 bulge TAR RNA mutant-EtBr complex as a function of concentration of **DPA60** (E). The plot for EtBr displacement (%) of the U3 bulge TAR RNA mutant-EtBr complex versus the log of the **DPA60**  $r_{dr}$ , the data shown with a sigmoidal fit, was used to determine the  $IC_{50}$  value (F). Buffer conditions: 100 mM KCl, 10 mM SC, 0.5 mM EDTA, pH 6.8. U3 bulge TAR RNA mutant = 200 nM/strand. [EtBr] = 5  $\mu$ M.



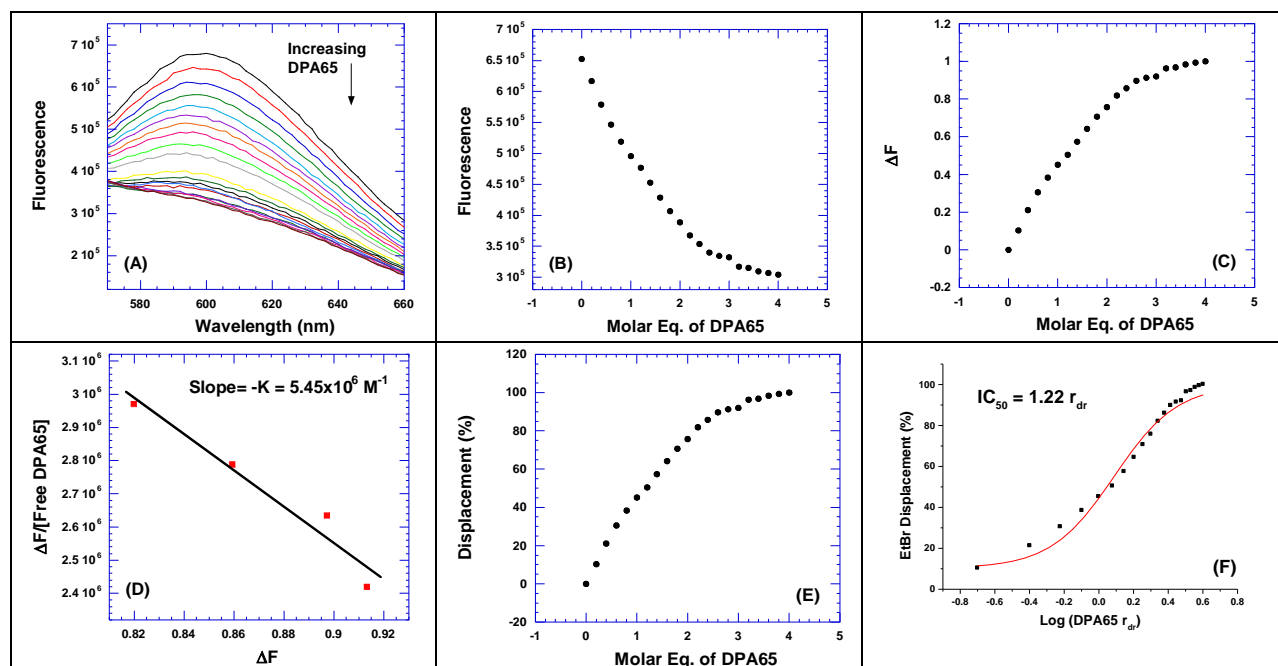

**Figure S4.39.** FID titration of **DPA65** with the **U3 bulge TAR RNA mutant**. Raw fluorescence emission spectra in the presence of increasing concentration of **DPA65** (A). The decrease of fluorescence intensity (at 610 nm) of the U3 bulge TAR RNA mutant/EtBr complex with increasing concentration of **DPA65** results in a saturating binding plot (B). The plot between normalized fluorescence intensity (at 610 nm) of the U3 bulge TAR RNA mutant-EtBr complex as a function of concentration of **DPA65** results in a saturating binding plot (C). The Scatchard plot analysis of **DPA65** with the U3 bulge TAR RNA mutant (D). The plot between normalized EtBr displacement (at 610 nm) of the U3 bulge TAR RNA mutant-EtBr complex as a function of concentration of **DPA65** (E). The plot for EtBr displacement (%) of the U3 bulge TAR RNA mutant-EtBr complex versus the log of the **DPA65**  $r_{dr}$ , the data shown with a sigmoidal fit, was used to determine the  $IC_{50}$  value (F). Buffer conditions: 100 mM KCl, 10 mM SC, 0.5 mM EDTA, pH 6.8. U3 bulge TAR RNA mutant = 200 nM/strand. [EtBr] = 5  $\mu$ M.

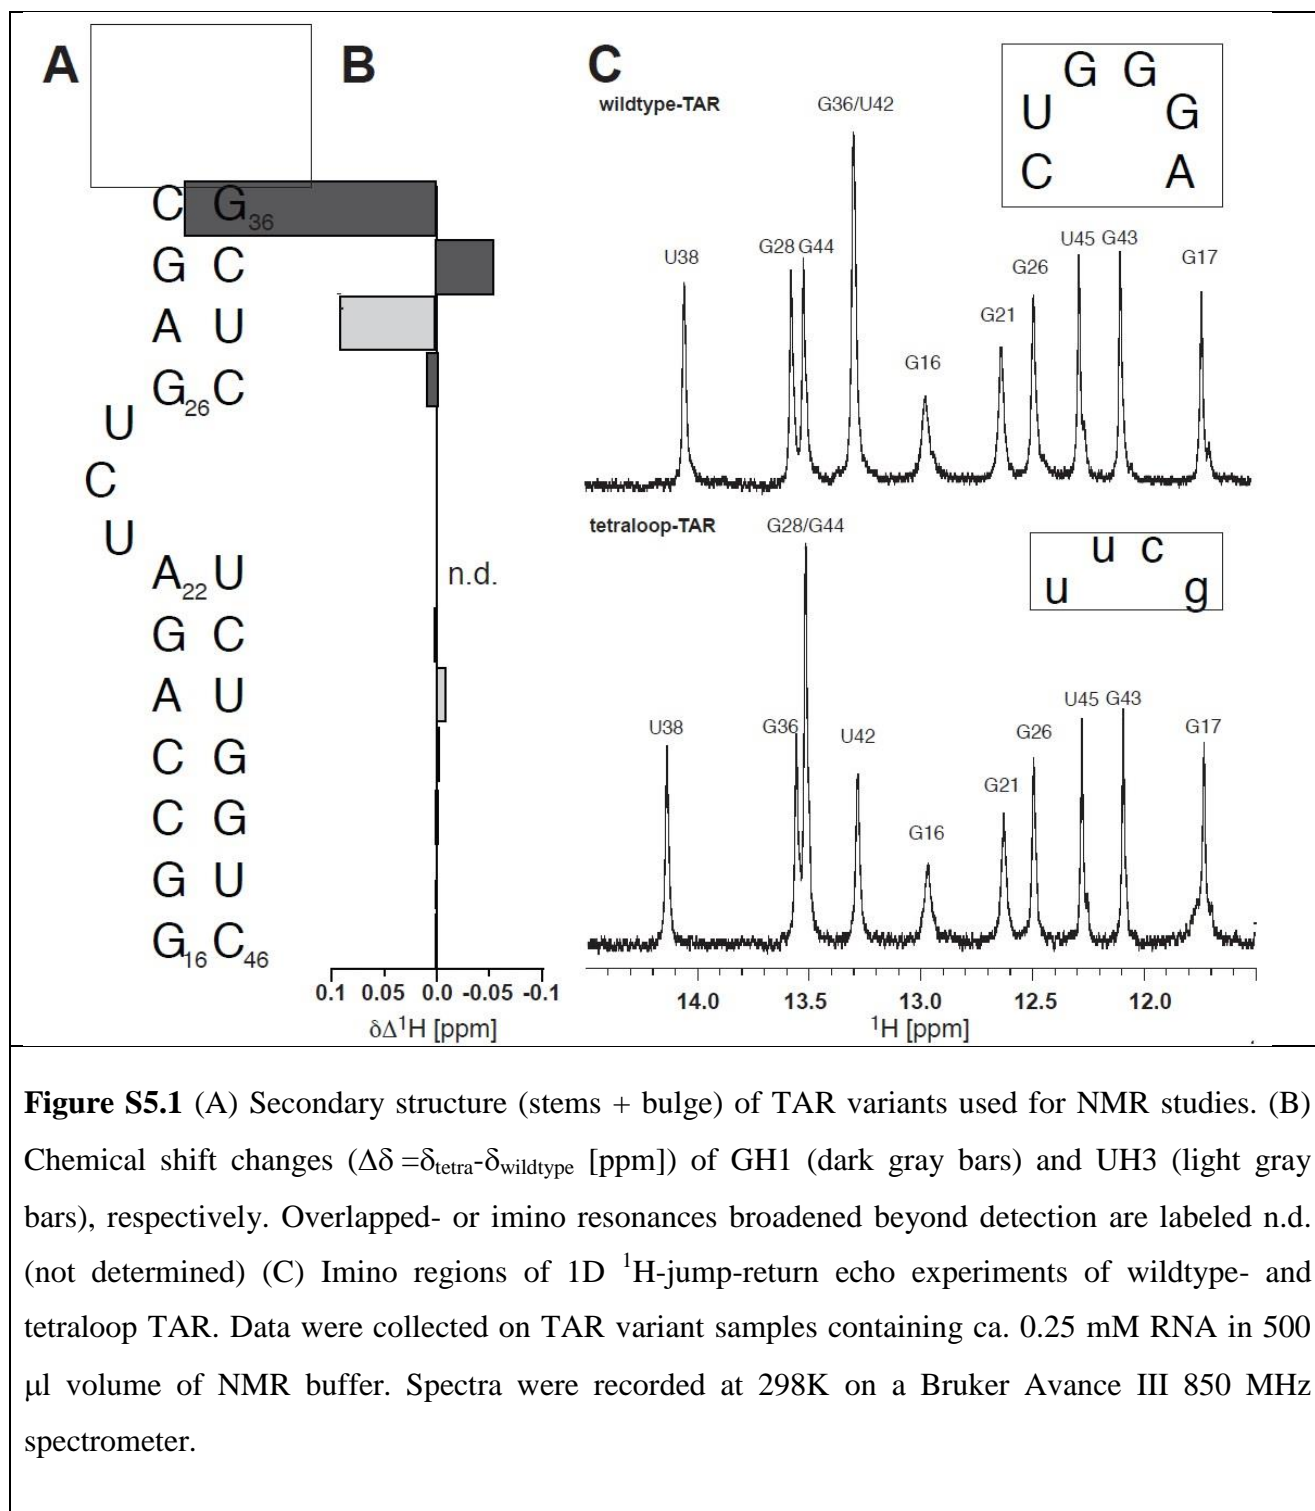

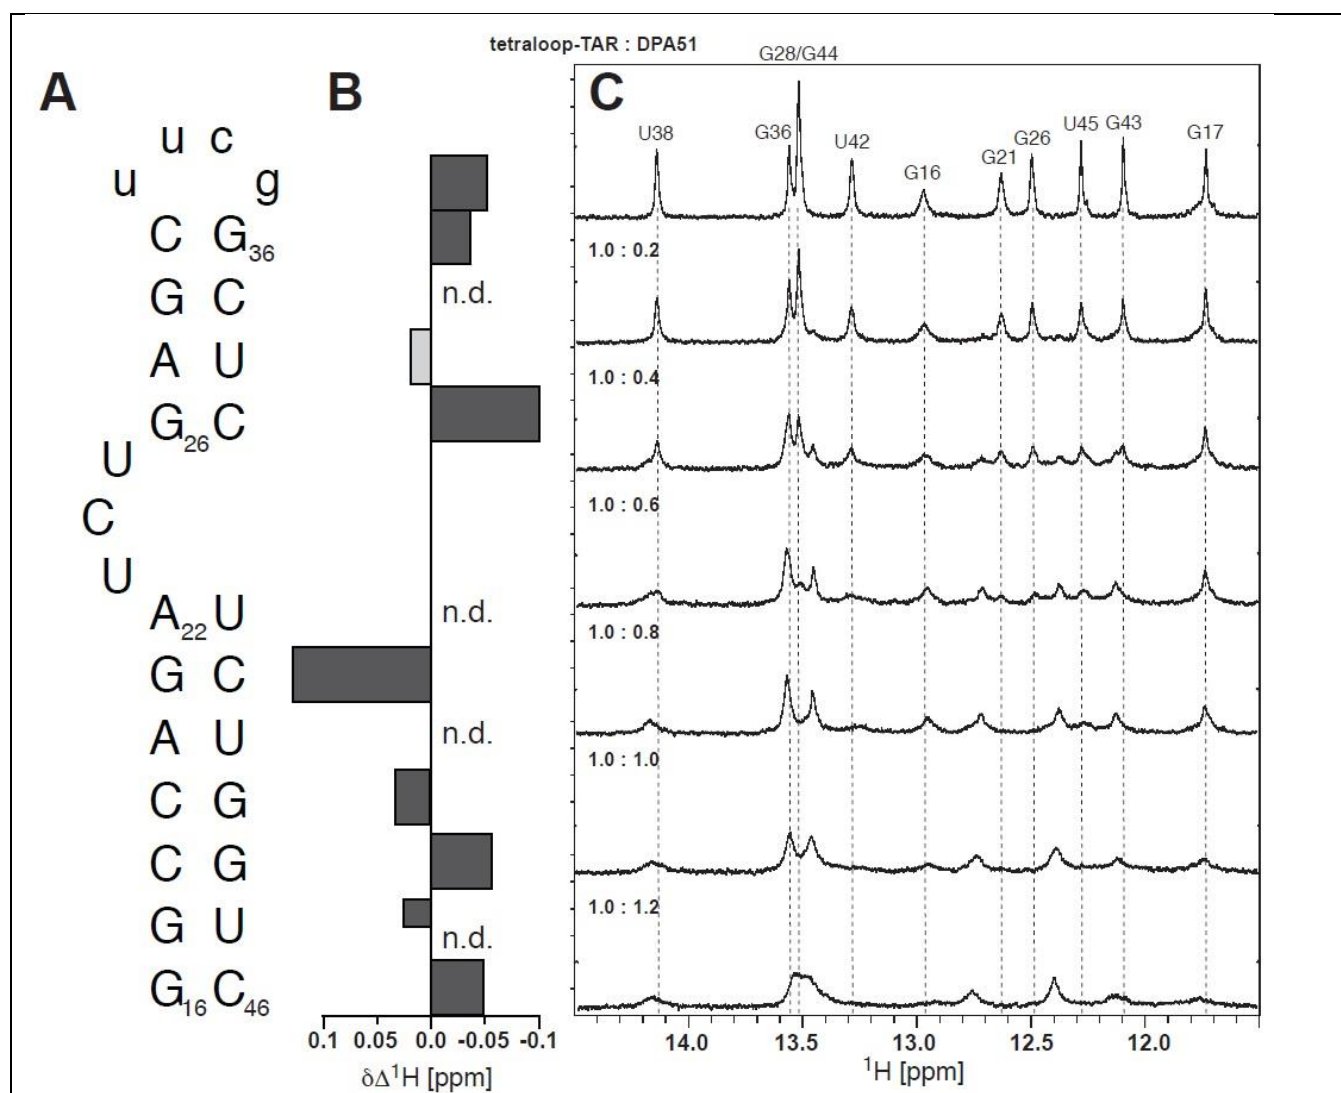

**Figure S5.2.** (A) Secondary structure of tetraloop TAR used for NMR studies. (B) Chemical shift changes ( $\Delta\delta = \delta_{\text{bound}} - \delta_{\text{free}}$  [ppm]) of GH1 (dark gray bars) and UH3 (light gray bars), respectively, observed for the tetraloop TAR-DPA51 complex. Overlapped- or imino resonances broadened beyond detection are labeled n.d. (not determined) (C) Imino regions of 1D  $^1\text{H}$ -jump-return echo experiments of tetraloop TAR with increasing amounts of DPA51. Data were collected on a tetraloop TAR sample containing ca. 0.25 mM RNA in 500  $\mu\text{l}$  volume of NMR buffer. Spectra were recorded at 298K on a Bruker Avance III 850 MHz spectrometer. Dashed black lines follow assigned imino proton resonances at various molar ratios of tetraloop TAR:DPA51.
